1

Version dated: September 29, 2020

2 ILS-Aware Analysis of Retroelements

# 3 **ILS-Aware Analyses of Retroelement Insertions in the** 4 **Anomaly Zone**

5 ERIN K. MOLLOY<sup>1</sup>, JOHN GATESY<sup>2</sup>, MARK S. SPRINGER<sup>3</sup>

6 <sup>1</sup>*Department of Computer Science, University of California, Los Angeles, Los Angeles, CA, USA*

7 <sup>2</sup>*Sackler Institute for Comparative Genomics, American Museum of Natural History, New York,*  
8 *NY, USA*

9 <sup>3</sup>*Department of Evolution, Ecology, and Organismal Biology, University of California, Riverside,*  
10 *Riverside, CA, USA*

## 11 **Corresponding authors:**

12 E. K. Molloy, E-mail: [ekmolloy@cs.ucla.edu](mailto:ekmolloy@cs.ucla.edu)

13 M. S. Springer, Email: [springer@ucr.edu](mailto:springer@ucr.edu)

14 *Abstract.*— A major shortcoming of concatenation methods for species tree estimation is  
15 their failure to account for incomplete lineage sorting (ILS). Coalescence methods explicitly  
16 address this problem, but make various assumptions that, if violated, can result in worse  
17 performance than concatenation. Given the challenges of analyzing DNA sequences with  
18 both concatenation and coalescence methods, retroelement insertions have emerged as  
19 powerful phylogenomic markers for species tree estimation. We show that two recently

20 proposed methods, SDPquartets and ASTRAL\_BP, are statistically consistent estimators  
21 of the species tree under the multispecies coalescent model, with retroelement insertions  
22 following a neutral infinite sites model of mutation. The accuracy of these and other  
23 methods for inferring species trees with retroelements has not been assessed in simulation  
24 studies. We simulate retroelements for four different species trees, including three with  
25 short branch lengths in the anomaly zone, and assess the performance of eight different  
26 methods for recovering the correct species tree. We also examine whether ASTRAL\_BP  
27 recovers accurate internal branch lengths for internodes of various lengths (in coalescent  
28 units). Our results indicate that two recently proposed ILS-aware methods, ASTRAL\_BP  
29 and SDPquartets, as well as the newly proposed ASTRID\_BP, always recover the correct  
30 species tree on data sets with large numbers of retroelements even when there are  
31 extremely short species-tree branches in the anomaly zone. Dollo parsimony performed  
32 almost as well as these ILS-aware methods. By contrast, unordered parsimony,  
33 polymorphism parsimony, and MDC recovered the correct species tree in the case of a  
34 pectinate tree with four ingroup taxa in the anomaly zone, but failed to recover the correct  
35 tree in more complex anomaly-zone situations with additional lineages impacted by  
36 extensive incomplete lineage sorting. Camin-Sokal parsimony always reconstructed an  
37 incorrect tree in the anomaly zone. ASTRAL\_BP accurately estimated branch lengths  
38 when internal branches were very short as in anomaly zone situations, but branch lengths  
39 were upwardly biased by more than 35% when species tree branches were longer. We derive  
40 a mathematical correction for these distortions, assuming the expected number of new  
41 retroelement insertions per generation is constant across the species tree. We also show  
42 that short branches do not need to be corrected even when this assumption does not hold;  
43 therefore, the branch lengths estimates produced by ASTRAL\_BP may provide insight into  
44 whether an estimated species tree is in the anomaly zone.

45 (Keywords: coalescence; incomplete lineage sorting; Laurasiatheria; Palaeognathae;

46 polymorphism parsimony; transposon)

47 Concatenation methods for species tree construction have been and continue to be  
48 widely used in analyses of phylogenomic data sets. However, a pitfall of these methods is  
49 that they fail to account for incomplete lineage sorting (ILS). The consequences of this  
50 problem are most pronounced when the species tree has consecutive short branches in the  
51 anomaly zone. In these instances, concatenation may fail because the most probable gene  
52 tree(s) is different from the species tree (Degnan and Rosenberg 2006, 2009). Given this  
53 situation, numerous authors have proposed coalescence-based methods for species tree  
54 reconstruction that explicitly account for ILS. The three main approaches for estimating  
55 species trees in the framework of the multispecies coalescent (MSC) are (1) methods such  
56 as \*BEAST (Heled and Drummond 2010) that co-estimate gene trees and species trees, (2)  
57 summary coalescence methods such as ASTRAL (Mirarab and Warnow 2015) that  
58 estimate species trees from gene trees, and (3) SNP methods such as SVDquartets  
59 (Chifman and Kubatko 2015) that infer species trees from nucleotide site patterns. Many  
60 of these methods are known to be statistically consistent under the multispecies coalescent  
61 given their assumptions (Nute et al. 2018; Roch et al. 2019; Islam et al. 2020). In the case  
62 of summary coalescence methods, where species trees are inferred from sequence-based  
63 gene trees, important assumptions of the MSC include neutral evolution, gene tree  
64 heterogeneity that results exclusively from ILS, and free recombination between loci but no  
65 intralocus recombination, where each locus is a coalescence gene (c-gene) (Liu et al. 2009).  
66 Intralocus recombination and violations of neutral evolution are also problematic for  
67 \*BEAST. If these assumptions are violated there is no guarantee that coalescence methods  
68 for species tree estimation will perform any better than concatenation, and in many  
69 empirical analyses seem to perform worse (e.g., Xi et al. 2014; Hosner et al. 2016; Oliveros

70 et al. 2019). Indeed, theoretical arguments and empirical evidence suggest that violations  
71 of these assumptions may be problematic for the application of summary coalescence  
72 methods with sequence-based gene trees (Huang et al. 2010; Meredith et al. 2011; Patel  
73 et al. 2013; Gatesy et al. 2013; Gatesy and Springer 2014; Springer and Gatesy 2016,  
74 2018a; Scornavacca and Galtier 2017; He et al. 2020). The problem of gene tree  
75 reconstruction error is especially troublesome and has been documented for numerous  
76 phylogenomic data sets (Mirarab and Warnow 2015; Simmons and Gatesy 2015; Springer  
77 and Gatesy 2016, 2017, 2018b; Gatesy et al. 2017, 2019; Shen et al. 2017). SNP methods  
78 avoid gene tree reconstruction error and problems that stem from intralocus recombination,  
79 but they can still be negatively impacted by non-neutral evolution, violations of the site  
80 substitution model, and deviations from ultrametricity.

81         Given these problems with existing coalescence methods, Springer et al. (2020)  
82 suggested that retroelement insertions are ideal markers for coalescence-based analyses  
83 because they satisfy the assumptions of the MSC much better than sequence-based gene  
84 trees or SNPs. Unlike DNA sequences, homoplasy is almost unknown for retroelement  
85 insertions (Shedlock et al. 2000, 2004; Ray et al. 2006; Kuritzin et al. 2016; Doronina et al.  
86 2017, 2019), so conflicting patterns that look like homoplasy may be attributed to ILS, i.e.  
87 hemiplasy (Avice and Robinson 2008). In addition, retroelements likely come closer to  
88 satisfying the neutral evolution assumption of the MSC because they generally occur in  
89 regions of the genome that are safe havens from selection (e.g., introns, intergenic regions)  
90 (Chuong et al. 2017). Finally, retroelements are singular events, and the presence/absence  
91 of a retroelement insertion is not subject to intralocus recombination (Springer et al. 2020).

92         Given these desirable properties of retroelement insertions that match the MSC,  
93 Springer et al. (2020) proposed two quartet-based ILS-aware methods (ASTRAL\_BP,  
94 SDPquartets) that can be applied to these markers. We show that both of these methods  
95 are statistically consistent under the MSC model, with retroelement insertions following a

96 neutral infinite sites model of mutation (see Mendes and Hahn 2017 for related theoretical  
97 results).

98       Whereas Springer et al. (2020) applied ASTRAL\_BP and SDPquartets to published  
99 retroelement data sets for Placentalia (Nishihara et al. 2009), Laurasiatheria (Doronina  
100 et al. 2017), Balaenopteroidea (Lammers et al. 2019), and Palaeognathae (Cloutier et al.  
101 2019; Sackton et al. 2019), these methods have not yet been tested on simulated data sets,  
102 where the true species trees are known. Variants of parsimony that commonly have been  
103 applied to retroelement data sets (Nikaido et al. 1999; Suh et al. 2015a; Lammers et al.  
104 2019) also have not been assessed in simulation studies. Here, we show how the *ms*  
105 program (Hudson 2002) can be used to simulate retroelement insertions and use this  
106 approach for four model species trees, three of which include consecutive short branch  
107 lengths that are in the anomaly zone. We then analyze these data sets with eight different  
108 methods for species tree reconstruction that take retroelement insertions or other  
109 low-homoplasmy binary (01) genomic characters such as nuclear copies of mitochondrial  
110 genes (NUMTs) or large indels as input.

111       Of the tested methods, unordered parsimony, Camin-Sokal parsimony, and Dollo  
112 parsimony apply equal (unordered) or differential (Camin-Sokal, Dollo) weights to forward  
113 changes and reversals. Two additional parsimony methods (MDC, polymorphism) infer  
114 species trees by minimizing deep coalescences or the extent of polymorphism on the tree,  
115 respectively. Both SDPquartets and ASTRAL\_BP effectively estimate species trees by  
116 analyzing retroelement insertions on subsets of four taxa; their utilization of quartets  
117 enables proofs of statistical consistency. ASTRAL\_BP gets its name, because it is  
118 implemented by encoding each retroelement as a “gene tree” with a single bipartition and  
119 then applying ASTRAL (Zhang et al. 2018) to the resulting set of incompletely resolved  
120 “gene trees.” We also explore using the gene tree summary method ASTRID (Vachaspati  
121 and Warnow 2015) in a similar fashion, calling this approach ASTRID\_BP.



145 ingroup taxa and the outgroup. Because of this long branch, the anomaly zone for  
146 unrooted gene trees converges to the anomaly zone for rooted gene trees on the ingroup  
147 taxa (Degnan 2013).

148         The first model species tree (4-ingroup taxa anomaly zone tree; Fig. 1A) is a  
149 pectinate tree with four ingroup taxa ( $A, B, C, D$ ) and an outgroup ( $Out$ ) where the two  
150 shallowest internal branches each have length 0.01 CUs. We let  $x$  denote the deeper branch  
151 and  $y$  the shallower branch. This tree is based on the 4-taxa anomaly zone tree employed  
152 by Mendes and Hahn (2017). A 4-taxa pectinate tree is the simplest case for the anomaly  
153 zone for rooted gene trees (Degnan and Rosenberg 2006), and thus a 5-taxa tree is the  
154 simplest case for unrooted anomalous genes trees (Degnan 2013). The two very short  
155 branches (0.01 CUs) within the ingroup ensure that this pectinate tree is deep in the  
156 anomaly zone because the minimum requirement for equal branch lengths  $x$  and  $y$  in the  
157 anomaly zone is 0.1542 CUs (Degnan and Rosenberg 2006); this is more than an order of  
158 magnitude longer than the branch lengths in our species tree.

159         The second model species tree (5-ingroup taxa anomaly zone; Fig. 1B) is a pectinate  
160 tree for five ingroup taxa ( $A, B, C, D, E$ ) and an outgroup ( $Out$ ) and includes three  
161 consecutive short internal branches of 0.01, 0.01, and 0.1 CUs (Fig. 1B) where  $x$  is the  
162 deepest branch, branch  $y$  is intermediate in depth, and  $z$  is the shallowest branch. This  
163 tree is also in the anomaly zone based on these internal branch lengths and represents one  
164 example of a 5-taxa anomaly zone tree (Rosenberg and Tao 2008; Degnan and Rosenberg  
165 2009). The third model species tree (Palaeognathae anomaly zone; Fig. 1C) is based on  
166 Cloutier et al.'s (2019) ASTRAL analysis of 20,850 loci (12,676 CNEEs, 5,016 introns,  
167 3,158 UCEs) for palaeognath birds (ratites, tinamous) and a chicken outgroup. We  
168 shortened the lengths of some of the terminal branches so that the final tree was  
169 ultrametric. Cloutier et al.'s (2019) species trees based on ASTRAL analysis contains three  
170 successive short branches that are within the anomaly zone. The fourth model species tree

171 (26-taxa species tree; Fig. 1D) does not have consecutive short branches in the anomaly  
172 zone but instead includes a wider range of internal branch lengths for examining potential  
173 branch length distortions in ASTRAL\_BP analysis.

## 174 *Simulations*

175 Retroelement insertions were simulated with the *ms* program (Hudson 2002), which enables  
176 coalescent simulations with 0/1 mutations occurring under a neutral infinite sites model of  
177 mutation. Kuritzin et al. (2016) and Doronina et al. (2019) previously utilized such a  
178 model in developing methods for detecting introgression using retroelement data sets. The  
179 infinite sites model with 0/1 mutations is appropriate for simulating retroelement insertion  
180 data because (1) retroelements are presence/absence (1/0) characters and (2) retroelement  
181 insertions at specific genomic sites are rare events, as are back mutations (i.e., precise  
182 excision of an inserted sequence) (Shedlock and Okada 2000; Doronina et al. 2019). Our  
183 simulations further assume free recombination among loci, no intralocus recombination,  
184 neutrality, no missing data, constant effective population size, and a uniform rate of  
185 retroelement insertions per unit length of the species tree. We simulated 25 replicate data  
186 sets from each of the four model species trees (Fig. 1) with one segregating site for each  
187 gene tree locus, where the probability of selecting a site on a given branch is proportional  
188 to its branch length divided by the total length of the gene tree (Hudson 2002). Given that  
189 we were primarily interested in whether different analytical methods converge on the  
190 correct species tree when there are short consecutive branches in the anomaly zone, we  
191 simulated data sets that were sufficiently large to contain more than 100,000 informative  
192 retroelements (i.e. the retroelement insertion induces at least one quartet) and then pruned  
193 these data sets to exactly 100,000 informative retroelements (note that species tree branch  
194 lengths were halved prior to simulating data, because the *ms* program uses a currency of  
195  $4N$  generations per unit for species tree and gene tree branch lengths, whereas a coalescent



196 unit is  $2N$  generations for a population of diploid individuals). We used a custom script for  
197 each species tree to simulate 25 data sets with *ms* and convert the output of each of these  
198 data sets into a nexus file (available on Dryad). Next, we used a batchfile command  
199 (available on Dryad) in PAUP\* to perform the following operations: (1) execute each of 25  
200 data sets, and for each data set, (2) exclude uninformative characters, (3) export a nexus  
201 file with informative characters only, (4) execute the new data set with informative  
202 characters only, (5) exclude all characters after the first 100,000 characters, (6) export a  
203 nexus file with the 100,000 informative characters, and (7) export a phylip file with the  
204 100,000 informative characters. In addition, each phylip file with 100,000 binary characters  
205 was converted into a Newick tree file with 100,000 bipartitions (each represented by a  
206 Newick string) using a script from Springer et al. (2020).

### 207 *Species Tree Estimation*

208 We estimated species trees using eight different phylogenetic methods: unordered  
209 parsimony, Camin-Sokal parsimony, Dollo parsimony, polymorphism parsimony, minimize  
210 deep coalescences (MDC), ASTRAL\_BP, ASTRID\_BP, and SDPquartets. All eight  
211 methods were applied to data sets that were simulated with the four species trees shown in  
212 Figure 1. Unordered, Camin-Sokal, and Dollo parsimony analyses were executed with  
213 PAUP\* 4.0a168 (Swofford 2002). Unordered parsimony applies equal weights to forward (0  
214 to 1) and reverse (1 to 0) changes; Camin-Sokal parsimony only allows forward changes;  
215 and Dollo parsimony allows for one forward change and as many reversals as are necessary  
216 to explain the character data (Felsenstein 2004). We used branch-and-bound searches for  
217 all analyses with the exception of the 26-taxa data set where we employed heuristic  
218 searches for Camin-Sokal and Dollo parsimony. In these cases, heuristic searches employed  
219 tree-bisection and reconnection branch swapping and stepwise addition with 100  
220 randomized input orders of taxa. Polymorphism parsimony analyses were performed with

221 the dollop program in PHYLIP version 3.695 (Felsenstein 1989) with the jumble option set  
222 to 50. For presence/absence (01) characters, polymorphism parsimony assumes that after a  
223 state of polymorphism for the two alleles is established in an ancestral population, all  
224 subsequent occurrences of state 0 or state 1 in terminal taxa result from losses of one or the  
225 other allele (Felsenstein 2004). We used PhyloNet (Than et al. 2008; Than and Nakhleh  
226 2009) to implement the MDC approach of Maddison (1997). MDC is a parsimony-based  
227 approach that infers a species tree from a set of gene trees, which in our case are  
228 incompletely resolved and include only a single bipartition, by minimizing the number of  
229 extra allelic lineages. Sanderson et al. (2020) suggested that polymorphism parsimony and  
230 MDC are equivalent approaches for inferring species trees. ASTRAL-III (Zhang et al.  
231 2018) and ASTRID (Vachaspati and Warnow 2015) are summary coalescence methods that  
232 allow for polytomies, but only the former returns branch lengths in CUs. As previously  
233 mentioned, ASTRAL\_BP (Springer et al. 2020) and ASTRID\_BP construct a species trees  
234 by representing each retroelement insertion as a newick string with a single bipartition and  
235 then running ASTRAL-III (version 5.7.3) or ASTRID, respectively. SDPquartets (Springer  
236 et al. 2020) is a quartet-based method that was developed for low-homoplasy 01  
237 (absence/presence) data such as retroelements. The first step with SDPquartets is to  
238 perform parsimony analyses with all possible subsets of four species. In the second step,  
239 optimal species trees on four taxa are assembled into a species tree on the full set of taxa  
240 using Matrix Representation with Parsimony (MRP) (Ragan 1992). We performed  
241 SDPquartets analyses with a custom Perl script  
242 (<https://github.com/dbsloan/SDPquartets>) that directs PAUP\* (Swofford 2002) to  
243 perform both steps of the analysis. We used branch-and-bound searches for the parsimony  
244 analyses of the MRP matrices to ensure recovery of all most parsimonious trees.

## RESULTS

246

## Theory

247 **Statistical consistency.** Given a retroelement insertion on four species  $\{A, B, C, D\}$ ,  
248 patterns 1100 and 0011 correspond to quartet  $AB|CD$ , patterns 1010 and 0101 correspond  
249 to quartet  $AC|BD$ , and patterns 1001 and 0110 correspond to quartet  $AD|BC$ . We  
250 assume that retroelement insertions are generated under the MSC + infinite sites neutral  
251 mutation model, parameterized by a rooted species tree topology on  $\{A, B, C, D\}$ , where  
252 each branch is annotated by the amount of time in generations, the effective population  
253 size, and the probability of new insertions for each individual allele in the population (note  
254 that the latter two parameters must also be specified for the population above the root).

Doronina et al. (2017) provided an approximation for the expected number of retroelement insertions displaying each of the six patterns when retroelement insertions are generated from four-taxon species networks. Under their approximation, which is based on the diffusion approximation of the Wright-Fisher coalescent model (Fisher 1922; Wright 1931) and the neutral mutation model (Kimura 1955a,b), we show that for the pectinate rooted species tree  $((A, B), C), D$  and for the balanced rooted species tree  $((A, B), (C, D))$ ,

$$P(1100) + P(0011) > P(1010) + P(0101) = P(1001) + P(0110) \quad (1)$$

255 where  $P(1100)$  is the probability that a retroelement insertion displaying one of the six  
256 informative patterns displays pattern 1100 (Theorem 6 in the Appendix). Theorem 6 does  
257 not require the expected number of new insertions per generation to be constant across the  
258 tree, and we use this result to show that SDPquartets and ASTRAL\_BP are statistically  
259 consistent.

260 **Theorem 1.** Suppose that retroelement insertions are generated under the MSC with

261 insertions following an infinite sites neutral model (as approximated by Doronina et al.  
262 2017), with a constant rate of insertions per generation across the four-taxon species tree.  
263 Then, SDPquartets using a branch-and-bound algorithm is statistically consistent.

*Proof.* SDPquartets uses parsimony to identify the species tree from the retroelement insertions restricted to every possible subset of four taxa. Specifically, for each of the three possible quartet topologies, denoted  $t_1, t_2, t_3$ , on four taxa, the parsimony score is computed as

$$\text{score}(t_i) = N(t_i) + (2 \times (N(t_{j \neq i, j}) + N(t_{k \neq i, j})))$$

264 where  $N(t_i)$  is the number of retroelement insertions that display topology  $t_i$ , and the tree  
265 with the lowest parsimony score is added to the set  $\mathcal{T}$  of source trees. By Theorem 6 in the  
266 Appendix, the most probable quartet agrees with the species tree and the two alternative  
267 quartets have equal probability. Therefore, as the number of retroelement insertions goes  
268 to infinity, SDPquartets identifies the true species tree on subsets of four taxa with  
269 probability going to one, so the true species tree  $T^*$  will be the unique compatibility  
270 supertree for  $\mathcal{T}$  with high probability.

271 SDPquartets runs the supertree method Matrix Representation with Parsimony  
272 (Ragan 1992) given  $\mathcal{T}$ . By Theorem 7.8 in Warnow (2017), when  $\mathcal{T}$  are compatible, any  
273 optimal solution to MRP is a refined compatibility supertree for  $\mathcal{T}$  (see Sections 3.2.1, 7.2,  
274 and 7.5 in Warnow 2017 for details). MRP is an NP-hard problem (Theorem 7.8 in  
275 Warnow 2017); however, branch-and-bound algorithms (Hendy and Penny 1982)  
276 guaranteed to find the optimal solution can be utilized whenever the number of taxa is  
277 sufficiently small. In this case, as the number of retroelement insertions goes to infinity, the  
278 optimal solution to MRP given  $\mathcal{T}$  equals  $T^*$  with probability going to one, so SDPquartets  
279 returns the true species tree with high probability.  $\square$

280 The proof of statistical consistency for ASTRAL\_BP is closely related to the proof

281 of statistical consistency for ASTRAL (Theorem 2 in Mirarab et al. (2014)), so we provide  
282 the proof in the Appendix (Theorem 3).

283 **Branch length estimation.** ASTRAL not only estimates the species tree topology but  
284 also the internal branch lengths (in CUs). Branch length estimation is based on quartet  
285 frequencies (i.e. the number  $z_1$  of gene trees that display the quartet induced by the branch  
286 divided by the total number  $n$  of gene trees); see Sayyari and Mirarab 2016 for details.  
287 Assuming the branch in question is correct, the maximum likelihood (ML) estimate of its  
288 length is  $\hat{\tau} = -\log(\frac{3}{2}(1 - \frac{z_1}{n}))$  (Theorem 2 in Sayyari and Mirarab 2016). This follows from  
289 their statistical framework (Lemma 1 in Sayyari and Mirarab 2016) and from the  
290 probability of gene trees under the MSC:

$$p_{A,B|C,D}^G = 1 - \frac{2}{3}e^{-\tau} \quad \text{and} \quad p_{A,C|B,D}^G = p_{A,D|B,C}^G = \frac{1 - p_{A,B|C,D}^G}{2} \quad (2)$$

291 where  $\tau$  is the length (in CUs) of the internal branch inducing  $A, B|C, D$  in the model  
292 species tree (Section 4.1 in Allman et al. 2011). As  $A, B|C, D$  agrees with the species tree,  
293 we refer to it as the “dominant quartet”; we refer to  $A, C|B, D$  and  $A, D|B, C$  as the  
294 “alternative quartets.”

295 The statistical framework proposed by Sayyari and Mirarab (2016) can be applied  
296 to retroelement insertions (Appendix); however, the formula for the probability of the  
297 dominant quartet is more complicated and depends on whether the model species tree is  
298 pectinate or balanced (Appendix). When internal branches of the model species tree are  
299 short enough so that the small angle approximation  $e^{-\tau} = 1 - \tau$  can be applied, the  
300 probability of the dominant quartet for the pectinate and balanced species tree simplifies  
301 to

$$p_{A,B|C,D} \approx \frac{1}{3} + \frac{2}{3}\tau \quad \text{and} \quad p_{A,C|B,D} = p_{A,D|B,C} \approx \frac{1 - p_{A,B|C,D}}{2}. \quad (3)$$

302 Applying the small angle approximation to Equation 2 also yields Equation 3; therefore,  
303 the ML branch lengths estimated using ASTRAL are applicable to retroelement insertions  
304 whenever the internal branches are sufficiently short (Figure 2).

To estimate longer branch lengths from retroelement insertions, a correction is required. If the expected number of new retroelement insertions per generation is constant across the species tree, the probability of the dominant quartet simplifies to

$$p_{A,B|C,D}^R = \frac{\frac{1}{3}e^{-\tau} + \tau}{e^{-\tau} + \tau} \quad \text{and} \quad p_{A,C|B,D}^R = p_{A,D|B,C}^R = \frac{1 - p_{A,B|C,D}^R}{2} \quad (4)$$

305 for both the pectinate and balanced species tree (Appendix). Then, using the statistical  
306 framework proposed by Sayyari and Mirarab (2016), we show that the ML estimate of the  
307 branch length is

$$\hat{\tau} = W\left[\frac{2}{3}\left(\frac{z_1}{n} - 1\right)^{-1} - 1\right] \quad (5)$$

308 where  $W$  is Lambert's  $W$  (Theorem 4 in the Appendix). This correction can be applied by  
309 running ASTRAL with the “-t 2” option to get the average quartet frequency for each  
310 branch (referred to as the normalized quartet support) and then substituting this value  
311 into Equation 5 for  $\frac{z_1}{n}$ . The ML estimate of the branch length does not exist when  $\frac{z_1}{n} = 1$   
312 (i.e. there is no conflict); in this case, we set the branch length to  $\infty$ . We set the  $\hat{\tau}$  to 0  
313 when  $\frac{z_1}{n} < \frac{1}{3}$  (as the branch is not in the species tree). A simple Python script for  
314 correcting branch lengths is available on Dryad; our hope is to integrate this as an option  
315 of ASTRAL in the near future.

316 **Branch support.** Lastly, ASTRAL provides a measure of branch support: the local  
317 posterior probability (local PP). This measure of support is appropriate for retroelement  
318 insertions with two caveats. First, the calculation of local PP is based on the effective  
319 number ( $EN$ ) of gene trees (in this case retroelement insertions) for the branch. Because

320 retroelement insertion does not induce quartets on all subsets of four taxa, some insertions  
321 will not have any information about the resolution of the branch in question. For  
322 retroelement insertion data sets, the  $EN$  can be quite low on some branches, and local PP  
323 should be interpreted cautiously in this case. We recommend reporting  $EN$  when  
324 analyzing retroelement insertion data sets with ASTRAL\_BP. Second, Lemma 2 in Sayyari  
325 and Mirarab (2016) states that local PP corresponds to the species tree being generated  
326 under a Yule process with birth rate  $\lambda$ ; furthermore, when  $\lambda = \frac{1}{2}$  (the default in ASTRAL),  
327 this corresponds to the prior on the probability of the dominant quartet being uniform.  
328 This interpretation (regarding the generation of the species tree under the Yule process)  
329 does not hold for retroelement insertions (Appendix); nevertheless, it seems reasonable to  
330 put a uniform prior for the probability of the dominant quartet. Lastly, ASTRAL returns  
331 the maximum a posteriori (MAP) estimate of branch lengths by default, which is based on  
332 the branch lengths being exponentially distributed. When the number of gene trees is  
333 large, this converges to the ML estimate, so we report the MAP estimate in the main text  
334 and the ML estimate in the Supplementary Text.

### 335 *Simulation Study*

336 **4-ingroup taxa anomaly zone species tree.** For the simulated tree with four ingroup  
337 taxa in the anomaly zone and a long outgroup branch, seven of eight methods  
338 (ASTRAL\_BP, ASTRID\_BP, SDPquartets, unordered parsimony, Dollo parsimony,  
339 polymorphism parsimony, MDC) returned the correct species-tree topology for all 25  
340 simulated data sets (Fig. 3A). Camin-Sokal parsimony always recovered an incorrect  
341 position for Taxon  $C$  as the sister to Taxon  $D$  instead of sister to Taxon  $A + \text{Taxon } B$   
342 (Fig. 3A).

343 Our results for unordered parsimony are consistent with those of Mendes and Hahn  
344 (2017) who also recovered the correct species tree with parsimony. A minor difference is

345 that these authors simulated mutations down each gene tree under a Jukes-Cantor model.  
346 Mendes and Hahn (2017) hypothesized that parsimony should return the correct species  
347 tree inside the 4-taxa (ingroup) anomaly zone even though the most probable gene tree(s)  
348 differs from the species tree. This is because the anomalous gene trees have very short  
349 internal branches, on average, relative to internal branches on gene trees that agree with  
350 the species tree. The net effect of these branch length differences is that the most common  
351 (democratic) site patterns will still support the correct species tree.

352 Than and Rosenberg (2011) showed that for a pectinate species tree with four  
353 ingroup taxa, the MDC criterion is statistically inconsistent if branch  $x = y < 0.2215$  CUs.  
354 By contrast, the corresponding length for the democratic vote criterion (i.e., favor species  
355 tree that matches the most common gene tree) is  $x = y < 0.1542$  CUs (Degnan and  
356 Rosenberg 2006). Thus, the anomaly zone is larger with MDC than with a simple  
357 democratic vote even though the MDC criterion specifically considers the mechanism of  
358 deep coalescence (Than and Rosenberg 2011). However, MDC is based on a parsimony  
359 criterion and fails to consider all elements of the multispecies coalescent such as the  
360 probability of a gene tree given a species tree. MDC also ignores branch lengths in gene  
361 trees. Than and Rosenberg (2011) suggested that these deficiencies may explain the  
362 statistical inconsistency of the MDC criterion. Given the above points, it is notable that  
363 MDC recovered the correct species tree in 25 of 25 simulations with four ingroup taxa even  
364 though the  $x$  and  $y$  branch lengths on the species tree are both 0.01, which is well below  
365 the threshold of 0.2215 CUs that results in an incorrect species tree when MDC is applied  
366 to full gene trees that are simulated from a species tree. We suggest that MDC infers the  
367 correct four-ingroup species tree with simulated retroelements because these are  
368 presence/absence characters, each of which corresponds to a single bipartition on a gene  
369 tree, and are more likely to occur on the generally longer internal branches of gene trees  
370 that agree with the species tree (Mendes and Hahn 2017).



371 Mean branch lengths on the ASTRAL\_BP tree for branches  $x$  and  $y$  have lengths  
372 0.0096 and 0.0102 CUs, respectively (Fig. 3A). Differences between the estimated and true  
373 branch lengths of 0.01 are minor, with mean error of 0.0021 and 0.0025, respectively. This  
374 is consistent with our theoretical results showing that small branch lengths do not need to  
375 be corrected, making ASTRAL\_BP a useful tool for determining whether the estimated  
376 species tree is in the anomaly zone.

377 **5-ingroup taxa anomaly zone species tree.** By contrast with the 4-ingroup taxa  
378 anomaly zone species tree, only four of eight methods (ASTRAL\_BP, ASTRID\_BP,  
379 SDPquartets, Dollo parsimony) recovered the correct 5-ingroup taxa anomaly zone tree  
380 (Fig. 3B). Unlike the three ILS-aware methods and Dollo parsimony that recovered the  
381 correct species tree for all 25 simulated datasets, unordered parsimony, Camin-Sokal  
382 parsimony, polymorphism parsimony, and MDC always recovered incorrect species trees  
383 that were not fully pectinate. These results demonstrate that many methods that have  
384 been previously applied to retroelement data sets are not immune to anomaly zone  
385 problems when there are more than four ingroup taxa. Indeed, Roch and Steel (2015)  
386 showed that concatenation (parsimony or maximum likelihood) can be positively  
387 misleading under the coalescent + infinite sites neutral mutation model for a 6-taxa species  
388 tree in the anomaly zone. Among methods that estimated the incorrect species tree, MDC  
389 always recovered the ingroup topology  $((E, (A, B), (C, D)))$ , but polymorphism parsimony  
390 only recovered this topology for 15 of 25 data sets and in ten other cases recovered different  
391 incorrect topologies. These results suggest that MDC and polymorphism parsimony do not  
392 always generate the same results (contra Sanderson et al. (2020)), at least as we have  
393 executed analyses using the programs for MDC and polymorphism parsimony.

394 ASTRAL\_BP recovered average branch lengths of 0.0103, 0.0103, and 0.1059 for  
395 branch  $x$  (0.01 CUs), branch  $y$  (0.01 CUs), and branch  $z$  (0.1 CUs), respectively (Fig. 3B).

396 The mean error was again small: 0.0018, 0.0018, and 0.0060, respectively.

397 **Palaeognathae anomaly zone species tree.** ASTRAL\_BP, ASTRID\_BP, and  
398 SDPquartets recovered the correct species tree for all 25 simulated data sets (Fig. 3C). On  
399 these trees, rheas are the sister-taxon to kiwis + emu + cassowary. Dollo parsimony  
400 recovered the correct tree for 22 of 25 simulated data sets and in the other three instances  
401 reconstructed rheas as the sister-taxon to kiwis + emu + cassowary + tinamous. The other  
402 four methods (unordered parsimony, Camin-Sokal parsimony, polymorphism parsimony,  
403 MDC) recovered the correct species tree except for the placement of rheas, which were  
404 always estimated as the sister taxon to tinamous (Fig. 3C). This misplacement of rheas  
405 occurs in a region of the species tree where there are consecutive short branches in the  
406 anomaly zone. Together with our results for the 5-ingroup taxa anomaly zone tree, the  
407 palaeognath results suggest that unordered parsimony, Camin-Sokal parsimony,  
408 polymorphism parsimony, and MDC are inappropriate methods for estimating species trees  
409 from retroelements when the anomaly zone is more complicated than a pectinate tree with  
410 four ingroup taxa. Dollo parsimony performs much better than the other parsimony  
411 methods in the anomaly zone situations examined here, although it was not as efficient or  
412 accurate as ASTRAL\_BP, ASTRID\_BP, and SDPquartets. These results are significant  
413 because retroelement data sets are commonly analyzed using variants of parsimony,  
414 including Camin-Sokal (e.g. Nikaido et al. 1999; Nilsson et al. 2010; Suh et al. 2011),  
415 unordered (e.g. Gatesy et al. 2013, 2019), polymorphism (e.g. Suh et al. 2015b; Doronina  
416 et al. 2015), and Dollo (e.g. Lammers et al. 2019).

417 The palaeognath species tree (Cloutier et al. 2019) based on ASTRAL analysis of  
418 sequence-based gene trees (Fig. 1C) includes three consecutive short branches with lengths  
419 of  $x = 0.3874$ ,  $y = 0.0194$ , and  $z = 0.0532$  CUs. These three consecutive branches are  
420 consistent with an anomaly zone situation for five taxa (Rosenberg 2013) and are the basis

421 for the claim that the palaeognath tree provides an empirical example of the anomaly zone  
422 (Cloutier et al. 2019; Sackton et al. 2019). By contrast, Springer et al. (2020) reconstructed  
423 a palaeognath species tree based on ASTRAL\_BP analysis of 4301 retroelement insertions  
424 from Cloutier et al. (2019) and recovered much longer branch lengths:  $x$  has length 2.5390  
425 ( $\infty$  corrected—because the ML estimate does not exist),  $y$  has length 0.8939 (0.8657  
426 corrected), and  $z$  has length 0.2528 (0.2587 corrected) CUs (Table 1). This suggests that  
427 the palaeognath species tree based on retroelements is well outside of the anomaly zone  
428 (although this result should be interpreted cautiously, as the effective numbers of  
429 retroelement insertions that induce quartets around branches  $x$ ,  $y$ , and  $z$  are 18, 26.23, and  
430 13.3, respectively). This result is in contrast with the results of our simulation study, where  
431 we simulated 25 retroelement insertion data sets from Cloutier et al.’s (2019) ASTRAL  
432 species tree and found that ASTRAL\_BP given these data produced species trees in the  
433 anomaly zone. Specifically, ASTRAL\_BP produced trees with the following mean branch  
434 lengths:  $x$  has length 0.452 (0.388 corrected),  $y$  has length 0.0189 (0.0188 corrected), and  $z$   
435 has length 0.0563 (0.0549 corrected). These branch lengths are also consistent with an  
436 anomaly zone situation (Table 1 in Supplemental Text). Lastly, while our correction tool  
437 does not have a large impact on these short branches, for branches greater than 1 CU, the  
438 mean percent error dropped from above 30% to 1% following correction (Figure 4A–C).

439 **26-taxa species trees.** Given the biased increase in branch lengths for longer branches  
440 on the Palaeognathae anomaly zone tree, we simulated retroelement data sets for a 26-taxa  
441 tree with internal branch lengths that range from 0.1 to 6.0 CUs. This range of branch  
442 lengths does not include the stem branch for the clade comprised of Taxa  $A$ – $T$  that has a  
443 length of 7.0 CUs because this internal branch is merged with the stem branch leading to  
444 Taxa  $U$ – $Z$  on the inferred ASTRAL\_BP species trees (Fig. 1D). There is no anomaly zone  
445 for the 26-taxa tree, and seven of eight phylogenetic methods estimated the correct species

446 tree for all 25 simulated data sets (Fig. 3D). Camin-Sokal parsimony recovered an incorrect  
447 phylogeny in 24 of 25 replicates with Taxon *E* + Taxon *F* misplaced as the sister to Taxon  
448 *G* + Taxon *H*. Applying our correction tool to branch lengths larger than 1 CU and  
449 shorter than 4 CUs reduced the mean percent error from over 30% to 1–3% (Fig. 4D–F).  
450 The percent error increases for uncorrected branch lengths larger than 4 CUs, but this  
451 increase in error is expected as the conditioning of the ML branch length estimation  
452 problem worsens with increasing branch lengths (Table 2 in the Supplementary Text).

## 453 DISCUSSION AND CONCLUSIONS

454 **Comparison of different methods for estimating species trees with**  
455 **retroelements.** We developed a pipeline for simulating retroelements based on the *ms*  
456 program (Hudson 2002) and used this simulation approach to compare the accuracy of  
457 eight phylogenetic methods for inferring the correct species tree from retroelement data.  
458 These methods include two summary coalescence approaches (quartet-based ASTRAL\_BP,  
459 distance-based ASTRID\_BP), one quartet-based coalescent method for 01 characters  
460 (SDPquartets), one method that minimizes deep coalescence (MDC), one method that  
461 minimizes the extent of polymorphism on the tree (polymorphism parsimony option of  
462 dollop), and three character-based parsimony methods (unordered, Camin-Sokal, Dollo)  
463 that give different weights to forward and reverse changes. All of these methods were  
464 tested on model species trees in the anomaly zone including the 4-ingroup taxa anomaly  
465 zone and 5-ingroup taxa anomaly zone trees that have consecutive short branch lengths  
466 (0.01 CUs). These branch lengths are much shorter than the minimum length of 0.1542  
467 CUs that is required for two consecutive and equal short branches to remain in the  
468 anomaly zone for gene-tree based analyses (Degnan and Rosenberg 2006). Moreover, Patel  
469 et al. (2013) suggested 400,000 years of evolution along a branch is a reasonable

470 approximation for a coalescent unit in vertebrates. If we use this approximation, then  
471 branch lengths of 0.01 CUs are equivalent to just 4,000 years and highlight the challenging  
472 conditions that we modeled.

473 Even in these extreme anomaly zone situations, ASTRAL\_BP, ASTRID\_BP, and  
474 SDPquartets consistently recovered the correct species tree. While ASTRAL\_BP and  
475 SDPquartets are statistically consistent for the assumptions that we have made here (see  
476 Methods and Appendix), the good performance of ASTRID\_BP suggests that it too may  
477 be statistically consistent under these conditions; future research should investigate this  
478 further. Dollo parsimony also performed well and only failed to recover the correct species  
479 tree in 3 of 25 simulations for the Palaeognathae anomaly zone tree (Fig. 3C). MDC,  
480 polymorphism parsimony, and unordered parsimony generally performed well in the  
481 simplest anomaly zone situation with a pectinate tree and four ingroup taxa (Fig. 1A).  
482 However, these three methods all failed in more complex anomaly zone situations with  
483 greater than four ingroup taxa (Fig. 3B-C). First, these methods failed to recover the  
484 pectinate species tree for five ingroup taxa in the anomaly zone, and as expected, more  
485 symmetrical species trees were recovered that are consistent with the occurrence of  
486 anomalous gene trees that are also more symmetrical (Table 7 in Rosenberg and Tao 2008).  
487 Second, these methods recovered an incorrect position for rheas in the palaeognath  
488 simulations. Finally, Camin-Sokal failed to recover the correct topology in all cases for  
489 species trees with anomaly zone situations, and only recovered the correct topology in 1 of  
490 25 simulations for the 26-taxa data set (Fig. 3).

491 Based on these experimental results, and on theoretical considerations pertaining to  
492 statistical consistency (for ASTRAL\_BP and SDPquartets), we suggest that ASTRAL\_BP,  
493 ASTRID\_BP, and SDPquartets are the most appropriate of the tested methods for  
494 inferring species trees with retroelements. We expect that these methods should also  
495 perform well with other low-homoplasy absence/presence characters such as NUMTs and

496 large indels that, along with retroelements, are becoming increasingly easy to mine from  
497 genomic sequences (Schull et al. 2019; Churakov et al. 2020).

498 **Branch length bias and the anomaly zone.** In our simulation study, the mean  
499 branch length distortion on ASTRAL\_BP trees based on retroelements was minimal for  
500 very short branches ( $<0.1$  CUs) in the anomaly zone (Figure 4B,E), but became  
501 progressively larger as species tree branches lengths increased from 0.2 CUs (+12%) to 1.5  
502 CUs (+38%). Distortion levels off at  $\sim 37\text{--}39\%$  for species tree branches in the range of  
503  $\sim 1.5$  to  $\sim 4.0$  CUs (Fig. 4C,F).

504 The recovery of accurate branch lengths for short branches is predicted based on our  
505 theoretical results and suggests that ASTRAL\_BP branch lengths without correction can  
506 be used to assess claims of empirical anomaly zones that are inferred from sequence-based  
507 gene trees (provided there are a sufficiently large number of retroelement insertions  
508 available to estimate the probabilities of quartets around the branch in question with high  
509 accuracy). By contrast, simulations show that gene tree reconstruction error in  
510 sequence-based analyses can result in branch length estimates on ASTRAL species trees  
511 that are too short by almost an order of magnitude when gene tree reconstruction error is  
512 high (Sayyari and Mirarab 2016).

513 A case in point is the species tree for palaeognath birds that Cloutier et al. (2019)  
514 claimed is in the anomaly zone based on both MP-EST and ASTRAL analyses, although  
515 many of gene trees were arbitrarily resolved and therefore inaccurately reconstructed  
516 (Springer et al. 2020). Gene tree reconstruction error is prevalent among phylogenomic  
517 studies and can occur because of long-branch misplacement, missing data, model  
518 misspecification, homology errors, arbitrary resolution of polytomies by programs such as  
519 RAxML and PhyML, and other causes (Gatesy and Springer 2014; Springer M. S. 2014;  
520 Springer and Gatesy 2016). Notably, Cloutier et al.'s (2019) ASTRAL species tree based

521 on sequence-based gene trees had much shorter branch lengths than Springer et al.'s (2020)  
522 ASTRAL\_BP species tree based on low-homoplasy retroelement insertions. The simulation  
523 results presented here provides additional support for the conclusion that the palaeognath  
524 species tree is not in the anomaly zone.

525         While short branches are typically of the most interest, longer branch lengths can  
526 be corrected using the technique proposed here, although recall that this technique assumes  
527 that the rate of retroelement insertions per generation is constant across the tree. By  
528 contrast, the result for short branches not needing the correction does not make this  
529 assumption, as it is derived using the small angle approximation. Overall, our results  
530 suggest that ASTRAL\_BP analysis of retroelement insertions is an effective approach for  
531 evaluating whether a species tree is in the anomaly zone.

532 **Future directions.** All of the analyses that we performed are based on large simulated  
533 data sets with 100,000 informative retroelements. These data sets are much larger than  
534 most published data sets for empirical retroelements (e.g., Doronina et al. 2017; Cloutier  
535 et al. 2019). We chose to simulate large data sets because the major motivation of our  
536 study was to determine if different species tree methods that have been applied to  
537 retroelement data sets converge on the correct or incorrect species tree, and in the case of  
538 ASTRAL\_BP if branch lengths in the anomaly zone are upwardly or downwardly biased. It  
539 remains for future studies to determine how many retroelements are required to estimate a  
540 correct species tree with high confidence for species trees with different numbers of taxa  
541 and varying branch lengths. Our computational pipeline based on the *ms* program should  
542 be useful for exploring this question experimentally.

543         It will also be important to use simulations to compare species trees that are  
544 inferred from sequence-based gene trees versus retroelement insertions. These simulations  
545 should be performed at various phylogenetic depths and with difficult anomaly zone branch

546 lengths. We expect that retroelements will fare well in such simulations, especially at deep  
547 divergences where the estimation of gene trees can be challenging, because these characters  
548 better satisfy assumptions of the MSC. Specifically, retroelements avoid or reduce problems  
549 with small c-gene size, recombination, and selection that impact the accurate reconstruction  
550 of sequence-based gene trees (Springer et al. 2020). Unlike DNA sequences, which show  
551 increased homoplasy with depth, retroelements are low-homoplasy markers in both shallow  
552 and deep phylogenetic settings when accurately coded. Retroelement insertions become  
553 more difficult to characterize at deep divergences because indels and other mutations can  
554 erase or obscure their history, but remain useful for phylogenetic problems that are at least  
555 as old as the radiations of placental mammals, crocodylians, and birds that each extend to  
556 the Cretaceous (Nishihara et al. 2009; Haddrath and Baker 2012; Suh et al. 2015a,b;  
557 Doronina et al. 2017). We emphasize that these methods should only be applied to  
558 empirical data sets with well-vetted coding of retroelements (Doronina et al. 2019).

559         A critical issue concerns the number of retroelements that are available for  
560 estimating species trees. Published data sets for mammalian retroelement insertions range  
561 from those with <100 retroelements (e.g., placental root, [Nishihara et al. 2009]) to 91,859  
562 for eight species of baleen whales (Lammers et al. 2019). In the latter case, 24,598 of these  
563 insertions are phylogenetically informative and occur in two to six of the balaenopteroid  
564 species. For protein-coding genes, the number of available loci is relatively fixed whether a  
565 data set includes genomes from five mammalian species or 500, because the majority of  
566 protein-coding genes are shared among these taxa. In humans, a recent estimate for the  
567 total number of protein-coding genes is 19,116 (Piovesan et al. 2019). By contrast,  
568 retroelement insertions are segregating sites as are single nucleotide mutations, albeit  
569 without the attendant homoplasy in the latter, and retroelement data sets are expected to  
570 increase in size as more taxa are added to a data set. For a taxonomically diverse genomic  
571 data set with more than 200 mammal species (e.g., Genereux et al. 2020), we are optimistic



572 that it will soon be possible to extract hundreds of thousands or even millions of  
573 informative retroelements as improved methods become available for efficiently extracting  
574 and applying quality-control filtering steps to assemble these data sets (Churakov et al.  
575 2020). Indeed, the number of informative markers will grow even larger if such data sets  
576 also include NUMTs and large indels (Schull et al. 2019). Combining these low-homoplasmy  
577 markers with sequence-based gene trees is a valuable direction of future research for  
578 mitigating the impact of gene tree estimation error and maximizing the amount of high  
579 quality data available for species tree estimation (Houde et al. 2019).

580 Because accurately-coded retroelement characters are unlikely to be impacted by  
581 homoplasmy, such data can be modeled under the MSC, with insertions following an infinite  
582 sites model. ASTRAL\_BP and SDPquartets are provably statistically consistent under this  
583 model and perform well in simulations in the anomaly-zone, at least when the number of  
584 retroelement insertions is quite large. Future phylogenomic studies should leverage the  
585 power of retroelements and other low-homoplasmy presence/absence characters that can now  
586 be analyzed with ILS-aware methods to resolve some of the most challenging phylogenetic  
587 problems that remain.

## 588 ACKNOWLEDGEMENTS

589 We thank Rick Baker for technical advice and Siavash Mirarab and Arun Durvasula for  
590 discussions.

## 591 FUNDING

592 This research was funded by the U.S. National Science Foundation (Grant No.  
593 DEB-1457735), the NSF Graduate Research Fellowship (Grant No. DGE-1144245), and  
594 the Ira and Debra Cohen Graduate Fellowship in Computer Science.

595

## SUPPLEMENTARY MATERIAL

596 Data available from the Dryad Digital Repository:

597 [http://dx.doi.org/10.5061/dryad.\[NNNN\]](http://dx.doi.org/10.5061/dryad.[NNNN])

598

## APPENDIX

599

### *Quartet Probabilities*

600 Kuritzin et al. (2016) and Doronina et al. (2017) model retroelement insertions under the  
601 MSC model with insertions following an infinite sites neutral mutation model. They use  
602  $\omega_{i,j}$  to represent the scenario where a retroelement insertion in the orthologous locus is  
603 absent (0) from lineages  $A_i$  and  $A_j$  and present (1) in lineages  $A_k$  and  $A_l$ , so

- 604 •  $\omega_{1,2} = 0011$  and  $\omega_{3,4} = 1100$  both display quartet  $A_1A_2|A_3A_4$ ,
- 605 •  $\omega_{1,3} = 0101$  and  $\omega_{2,4} = 1010$  both display quartet:  $A_1A_3|X_2A_4$ , and
- 606 •  $\omega_{1,4} = 0110$  and  $\omega_{2,3} = 1001$  both display quartet:  $A_1A_4|A_2A_3$ .

607 Doronina et al. (2017) derive an approximation for the expected number  $a_{i,j}$  of  
608 retroelement insertions with property  $\omega_{i,j}$  for three different phylogenetic networks on four  
609 species based on the diffusion approximation of the Wright-Fisher coalescent model (Fisher  
610 1922; Wright 1931) and the neutral mutation model (Kimura 1955a,b). Their  
611 “Hybridization model 1” is equivalent to

- 612 • a pectinate species tree  $((A_4, A_3), A_2), A_1)$  when  $\gamma_1 = 0$  and  $\gamma_2 = 1$  and
- 613 • a balanced model species tree  $((A_4, A_3), (A_2, A_1))$  when  $\gamma_1 = 1$  and  $\gamma_2 = 0$

(see Figure 6 in Doronina et al. (2017) Supplemental Materials S1). We simplify the equations that they derived for “Hybridization model 1” in order to compute the probability of observing retroelement insertions corresponding to each quartet  $A_i A_j | A_k A_l$ :

$$p_{i,j|k,l}^R = \frac{a_{i,j} + a_{k,l}}{a_{i,j} + a_{i,k} + a_{i,l} + a_{j,k} + a_{j,l} + a_{l,k}} \quad (6)$$

614 We then verify that  $p_{1,2|3,4}^R > p_{1,3|2,4}^R = p_{1,4|2,3}^R$  for the pectinate and balanced model species  
615 trees with unrooted topology:  $A_1 A_2 | A_3 A_4$ . This is summarized in the following theorem.

616 **Theorem 2.** Suppose that retroelement insertions are generated under the MSC with  
617 insertions following an infinite sites neutral model (as approximated by Doronina et al.  
618 2017), with a constant rate of insertions per generation across the four taxa species tree.  
619 Then, the most probable quartet agrees with the unrooted species tree, and the two  
620 alternative quartets have equal probability.

*Proof.* For the **pectinate model species tree**, let  $\tau_3$  be the length (in CUs) of the internal branch separating  $A_2, A_3, A_4$  from  $A_1$ , and let  $\tau_2$  be the length (in CUs) of the internal branch separating  $A_3, A_4$  from  $A_1, A_2$ . Let  $n_i$  be the expected number of new retroelement insertions per generation on the branch with length  $\tau_i$  or on the above the root population when  $i = 0$  (note that  $n_i$  is the probability of a new retroelement insertion occurring in an individual times the effective population size). Simplifying the equations from Doronina et al. (2017), the expected number of retroelement insertions that display the quartet topology that agrees with the unrooted model species tree (i.e.  $A_1, A_2 | A_3, A_4$ ) is

$$\begin{aligned} a_{1,2} + a_{3,4} = & n_0 \left( e^{-\tau_2} - \frac{1}{2} e^{-\tau_2 - \tau_3} - \frac{1}{6} e^{-3\tau_2 - \tau_3} \right) \\ & + n_2 \left( 1 - e^{-\tau_2} - \frac{2}{3} e^{-\tau_3} + \frac{1}{2} e^{-\tau_2 - \tau_3} + \frac{1}{6} e^{-3\tau_2 - \tau_3} \right) \\ & + n_3 (\tau_3 - 1 + e^{-\tau_3}) \end{aligned} \quad (7)$$

and the expected number of retroelement insertions that display one of the two alternative quartets (i.e.  $A_1, A_3|A_2, A_4$  and  $A_1, A_4|A_2, A_3$ ) is

$$a_{1,3} + a_{2,4} = a_{1,4} + a_{2,3} = n_0 \left( \frac{1}{2} e^{-\tau_2 - \tau_3} - \frac{1}{6} e^{-3\tau_2 - \tau_3} \right) + n_2 \left( \frac{1}{3} e^{-\tau_3} - \frac{1}{2} e^{-\tau_2 - \tau_3} + \frac{1}{6} e^{-3\tau_2 - \tau_3} \right) \quad (8)$$

(see Section 1 of the Supplementary Text for details). Now we verify that

$$\begin{aligned} & (p_{1,2}^R + p_{3,4}^R) - (p_{1,3}^R + p_{2,4}^R) > 0 \\ & (a_{1,2} + a_{3,4}) - (a_{1,3} + a_{2,4}) > 0 \\ & n_0 \left( e^{-\tau_2} - \frac{1}{2} e^{-\tau_2 - \tau_3} - \frac{1}{6} e^{-3\tau_2 - \tau_3} \right) - n_0 \left( \frac{1}{2} e^{-\tau_2 - \tau_3} - \frac{1}{6} e^{-3\tau_2 - \tau_3} \right) \\ & + n_2 \left( 1 - e^{-\tau_2} - \frac{2}{3} e^{-\tau_3} + \frac{1}{2} e^{-\tau_2 - \tau_3} + \frac{1}{6} e^{-3\tau_2 - \tau_3} \right) - n_2 \left( \frac{1}{3} e^{-\tau_3} - \frac{1}{2} e^{-\tau_2 - \tau_3} + \frac{1}{6} e^{-3\tau_2 - \tau_3} \right) \\ & + n_3 (\tau_3 - 1 + e^{-\tau_3}) > 0 \\ & n_0 \left( e^{-\tau_2} - e^{-\tau_2 - \tau_3} + \frac{1}{3} e^{-3\tau_2 - \tau_3} \right) + n_2 \left( 1 - e^{-\tau_2} - e^{-\tau_3} + e^{-\tau_2 - \tau_3} \right) + n_3 (\tau_3 - 1 + e^{-\tau_3}) > 0. \end{aligned}$$

This inequality holds for  $n_0, n_1, n_2, \tau_1, \tau_2 > 0$ , because the first term is positive by

$$\begin{aligned} 1 &> e^{-\tau_2} \\ 1 - e^{-\tau_2} &> 0 \\ (1 - e^{-\tau_2}) \times e^{-\tau_3} &> 0 \times e^{-\tau_3} \\ e^{-\tau_2} - e^{-\tau_2 - \tau_3} &> 0, \end{aligned}$$

621 the second term is positive by  $1 - e^{-\tau_2} - e^{-\tau_3} + e^{-\tau_2 - \tau_3} = (1 - e^{-\tau_2})(1 - e^{-\tau_3})$  and the third  
 622 term is positive by  $1 - \tau_2 < e^{-\tau_2}$  (Bernoulli's inequality). For the pectinate model species  
 623 tree, the most probable quartet on species  $A_1, A_2, A_3$ , and  $A_4$  agrees with the species tree

624 on species  $A_1, A_2, A_3,$  and  $A_4,$  and the two alternative quartet trees have equal probability.

For the **balanced model species tree**, let  $\tau_1$  be the length (in CUs) of the internal branch above  $A_1, A_2,$  and let  $\tau_3$  be the length (in CUs) of the internal branch above  $A_3, A_4.$  Let  $n_i$  be the expected number of new retroelement insertions per generation corresponding to the same branch as length  $\tau_i$  or the above the root population when  $i = 0.$  Simplifying the equations from Doronina et al. (2017), the expected number of retroelement insertions that display the quartet topology that agrees with the species tree (i.e.  $A_1, A_2|A_3, A_4$ ) is

$$a_{1,2} + a_{3,4} = n_0 \left( 2 - e^{-\tau_1} - e^{-\tau_3} + \frac{1}{3} e^{-\tau_1 - \tau_3} \right) + n_1 (\tau_1 - 1 + e^{-\tau_1}) + n_3 (\tau_3 - 1 + e^{-\tau_3}), \quad (9)$$

and the expected number of retroelement insertions that display one of the two alternative quartets (i.e.  $A_1, A_3|A_2, A_3$  and  $A_1, A_4|A_2, A_3$ ) is

$$a_{1,3} + a_{2,4} = a_{1,4} + a_{2,3} = n_0 \frac{1}{3} e^{-\tau_1 - \tau_3}. \quad (10)$$

(see Section 2 of the Supplementary Text for details). Now we verify that

$$\begin{aligned} (p_{1,2}^R + p_{3,4}^R) - (p_{1,3}^R + p_{2,4}^R) &> 0 \\ (a_{1,2} + a_{3,4}) - (a_{1,3} + a_{2,4}) &> 0 \\ n_0 \left( 2 - e^{-\tau_1} - e^{-\tau_3} + \frac{1}{3} e^{-\tau_1 - \tau_3} \right) - n_0 \frac{1}{3} e^{-\tau_1 - \tau_3} + n_1 (\tau_1 - 1 + e^{-\tau_1}) + n_2 (\tau_3 - 1 + e^{-\tau_3}) &> 0 \\ n_0 (2 - e^{-\tau_1} - e^{-\tau_3}) + n_1 (\tau_1 - 1 + e^{-\tau_1}) + n_2 (\tau_3 - 1 + e^{-\tau_3}) &> 0 \end{aligned}$$

625 This inequality holds for  $n_0, n_1, n_2, \tau_1, \tau_3 > 0,$  because the first term is positive as  $1 > e^{-\tau_i}$   
 626 and the second and third terms are positive as  $e^{-\tau_i} > 1 - \tau_i$  (Bernoulli's inequality). For  
 627 the balanced model species tree, the most probable quartet on species  $A_1, A_2, A_3,$  and  $A_4$   
 628 agrees with the species tree on species  $A_1, A_2, A_3,$  and  $A_4,$  and the alternative two quartet

629 trees have equal probability. □

630 The theorem above enables proofs of statistical consistency for two different  
631 quartet-based methods: SDPquartets (Theorem 1) and ASTRAL\_BP (below).

632 **Theorem 3.** Under the conditions of Theorem 2, ASTRAL\_BP is statistical consistent.

633 *Proof.* Let  $T^*$  be the true species tree on taxon set  $S$ , and let  $w_{\mathcal{R}}(T|_{S_i})$  denote the number  
634 of retroelement insertions in  $\mathcal{R}$  that displays the same quartet topology as tree  $T$  restricted  
635 to a subset  $S_i$  of four taxa, with  $1 \leq i \leq m = \binom{|S|}{4}$ . Note that  $w_{\mathcal{R}}(T|_{S_i})$  can be 0 either  
636 because the retroelement insertion displays a different topology than  $T$  or because the  
637 retroelement insertion does not display any of the three possible quartet topologies on  $S_i$   
638 (e.g. the insertion 11000 for taxon set  $\{A, B, C, D, E\}$ , represented as  $((A, B), C, D, E)$ ,  
639 does not display a quartet for taxon subset  $\{A, C, D, E\}$ ).

640 Let  $n_i$  be the number of retroelement insertions in  $\mathcal{R}$  that displays any of the three  
641 possible quartet topologies on taxon subset  $S_i$ . For all  $i \in \{1, 2, \dots, m\}$ , as the total  
642 number of retroelement insertions goes to infinity,  $n_i$  also goes to infinity (i.e.  $n_i$  is not  
643 bounded). Then, because the most probable quartet agrees with the true species tree  $T^*$   
644 and the two alternative quartets have lesser probability (Theorem 2), for any possible tree  
645 topology  $T$  on taxon set  $S$  and for all  $i \in \{1, 2, \dots, m\}$ ,  $w_{\mathcal{R}}(T|_{S_i}) \leq w_{\mathcal{R}}(T^*|_{S_i})$  with  
646 probability going to one, as the number of retroelement insertions goes to infinity. It  
647 follows that the true species tree  $T^*$  is the unique optimal solution to maximum quartet  
648 support supertree (MQSS) problem with high probability (recall that the MQSS problem is  
649 to find  $T$  such that  $\sum_{i=1}^m w_{\mathcal{R}}(T|_{S_i})$  is maximized).

650 The MQSS problem is NP-hard (Jiang et al. 2001; Lafond and Scornavacca 2019);  
651 however, when the solution space is constrained by a set  $\Sigma$  of bipartitions, it can be solved  
652 in polynomial time (Bryant and Steel 2001; Mirarab et al. 2014). ASTRAL implements an  
653 exact algorithm for solving the bipartition-constrained version of the MQSS problem, and

654 by default, every bipartition in the input (in this case  $\mathcal{R}$ ) is added to the constraint set  $\Sigma$ .

655       Because every retroelement insertion (0/1) pattern occurs under the MSC + neutral  
656 infinite sites model with non-zero probability, the probability that every bipartition in  $T^*$  is  
657 represented by a retroelement insertion in  $\mathcal{R}$  goes to 1, as the number of retroelement  
658 insertions goes to infinity; therefore, ASTRAL given  $\mathcal{R}$  returns the true species tree with  
659 high probability. □

### 660                                   *Quartet probabilities for short internal branches*

661 We now consider what happens **both** internal branches are short enough so that the small  
662 angle approximation can be applied.

For the **pectinate model species tree**, suppose both  $\tau_2$  and  $\tau_3$  are sufficiently short, then we can apply the small angle approximation  $e^{-\tau_i} \approx 1 - \tau_i$  and drop the higher order terms (e.g.  $\tau_2\tau_3$  and  $\tau_2^2$ ). From Equation 7, the expected number of retroelement

insertions displaying the quartet that agrees with the species tree is

$$\begin{aligned}
 a_{1,2} + a_{3,4} &= n_0 \left( e^{-\tau_2} - \frac{1}{2} e^{-\tau_2 - \tau_3} - \frac{1}{6} e^{-3\tau_2 - \tau_3} \right) \\
 &\quad + n_2 \left( 1 - e^{-\tau_2} - \frac{2}{3} e^{-\tau_3} + \frac{1}{2} e^{-\tau_2 - \tau_3} + \frac{1}{6} e^{-3\tau_2 - \tau_3} \right) \\
 &\quad + n_3 (\tau_3 - 1 + e^{-\tau_3}) \\
 &\approx n_0 \left( (1 - \tau_2) - \frac{1}{2} (1 - \tau_2)(1 - \tau_3) - \frac{1}{6} (1 - \tau_2)^3 (1 - \tau_3) \right) \\
 &\quad + n_2 \left( 1 - (1 - \tau_2) - \frac{2}{3} (1 - \tau_3) + \frac{1}{2} (1 - \tau_2)(1 - \tau_3) + \frac{1}{6} (1 - \tau_2)^3 (1 - \tau_3) \right) \\
 &\quad + n_3 (\tau_3 - 1 + (1 - \tau_3)) \\
 &\approx n_0 \left( (1 - \tau_2) - \frac{1}{2} (1 - \tau_2 - \tau_3) - \frac{1}{6} (1 - 3\tau_2 - \tau_3) \right) \\
 &\quad + n_2 \left( 1 - (1 - \tau_2) - \frac{2}{3} (1 - \tau_3) + \frac{1}{2} (1 - \tau_2 - \tau_3) + \frac{1}{6} (1 - 3\tau_2 - \tau_3) \right) \\
 &= n_0 \left( \frac{1}{3} + \frac{2}{3} \tau_3 \right)
 \end{aligned}$$

and from Equation 8, the expected number of retroelement insertions displaying the alternative quartets is

$$a_{1,3} + a_{2,4} = a_{1,4} + a_{2,3} \approx n_0 \left( \frac{1}{3} - \frac{1}{3} \tau_3 \right)$$

(see Section 1 of the Supplementary Text for details). Repeating this approximation for the **balanced model species tree** using Equations 9 and 10 gives

$$a_{1,2} + a_{3,4} \approx n_0 \left( \frac{1}{3} + \frac{2}{3} (\tau_1 + \tau_3) \right) \text{ and } a_{1,3} + a_{2,4} = a_{1,4} + a_{2,3} \approx n_0 \left( \frac{1}{3} - \frac{1}{3} (\tau_1 + \tau_3) \right)$$

(see Section 2 of the Supplementary Text for details). Plugging these formulas into



Equation 6 gives

$$p_{1,2|3,4}^R \approx \frac{1}{3} + \frac{2}{3}\tau \quad \text{and} \quad p_{1,3|2,4}^R = p_{1,4|2,3}^R \approx \frac{1}{3} - \frac{1}{3}\tau \quad (11)$$

663 where  $\tau$  is the length of the internal branch that induces quartet  $A_1, A_2|A_3, A_4$ . For the  
 664 pectinate model species tree,  $\tau = \tau_3$  (but recall that  $\tau_2$  must also be short for the  
 665 approximation to apply) and  $\tau = \tau_1 + \tau_3$  for the balanced model species tree.

666 *Quartet probabilities when the expected number of new retroelement*  
 667 *insertions per generation is constant*

668 We now consider what happens when the expected number of retroelement insertions per  
 669 generation is constant across the species tree.

For the **pectinate model species tree**, we set  $n_0 = n_2 = n_3$ . From Equation 7, the expected number of retroelement insertions displaying the quartet that agrees with the species tree is

$$\begin{aligned} a_{1,2} + a_{3,4} &= n_0 \left( e^{-\tau_2} - \frac{1}{2}e^{-\tau_2-\tau_3} - \frac{1}{6}e^{-3\tau_2-\tau_3} \right) \\ &\quad + n_2 \left( 1 - e^{-\tau_2} - \frac{2}{3}e^{-\tau_3} + \frac{1}{2}e^{-\tau_2-\tau_3} + \frac{1}{6}e^{-3\tau_2-\tau_3} \right) \\ &\quad + n_3 (\tau_3 - 1 + e^{-\tau_3}) \\ &= n_3 \tau_3 + n_3 e^{-\tau_3} - n_2 \frac{2}{3}e^{-\tau_3} + (n_2 - n_3) + (n_0 - n_2) \left( e^{-\tau_2} - \frac{1}{2}e^{-\tau_2-\tau_3} - \frac{1}{6}e^{-3\tau_2-\tau_3} \right) \\ &= n_0 \left( \tau_3 + \frac{1}{3}e^{-\tau_3} \right) \end{aligned}$$

and from Equation 8, the expected number of retroelement insertions displaying the

alternative quartets is

$$\begin{aligned} a_{1,3} + a_{2,4} = a_{1,4} + a_{2,3} &= n_0 \left( \frac{1}{2} e^{-\tau_2 - \tau_3} - \frac{1}{6} e^{-3\tau_2 - \tau_3} \right) + n_2 \left( \frac{1}{3} e^{-\tau_3} - \frac{1}{2} e^{-\tau_2 - \tau_3} + \frac{1}{6} e^{-3\tau_2 - \tau_3} \right) \\ &= n_2 \frac{1}{3} e^{-\tau_3} + (n_0 - n_2) \left( \frac{1}{2} e^{-\tau_2 - \tau_3} - \frac{1}{6} e^{-3\tau_2 - \tau_3} \right) \\ &= n_0 \frac{1}{3} e^{-\tau_3} \end{aligned}$$

(see Section 1 of the Supplementary Text for details). Repeating this simplification (i.e.  $n_0 = n_1 = n_3$ ) for the **balanced model species tree** using Equations 9 and 10 gives

$$a_{1,2} + a_{3,4} = n_0 \left( (\tau_1 + \tau_3) + \frac{1}{3} e^{-(\tau_1 + \tau_3)} \right) \text{ and } a_{1,3} + a_{2,4} = a_{1,4} + a_{2,3} = n_0 \frac{1}{3} e^{-(\tau_1 + \tau_3)}$$

(see Section 1 in the Supplementary Text for details). Plugging these formulas into Equation 6 gives

$$p_{1,2|3,4}^R = \frac{\frac{1}{3} e^{-\tau} + \tau}{e^{-\tau} + \tau} \quad \text{and} \quad p_{1,3|2,4}^R = p_{1,4|2,3}^R = \frac{\frac{1}{3} e^{-\tau}}{e^{-\tau} + \tau} \quad (12)$$

670 where  $\tau$  is the length of the internal branch that induces quartet  $A_1, A_2|A_3, A_4$ . For the  
671 pectinate model species tree,  $\tau = \tau_3$  and  $\tau = \tau_1 + \tau_3$  for the balanced model species tree.

## 672 *Maximum Likelihood Branch Length Estimation*

673 We now show how to compute the maximum likelihood (ML) estimate of the lengths of the  
674 internal branches for retroelement data sets using the framework (and notation) proposed  
675 by Sayyari and Mirarab (2016).

676 Consider a species tree on four taxa with unrooted topology:  $A_1, A_2|A_3, A_4$ . Let  $\theta_1$   
677 denote the probability of the dominant topology (i.e.  $A_1, A_2|A_3, A_4$ ); similarly, let  $\theta_2$  and  $\theta_3$   
678 denote the probabilities of the two alternative topologies (i.e.  $A_1, A_3|A_2, A_4$  and

679  $A_1, A_4|A_2, A_3$ ). When retroelement insertions are generated under the MSC + infinite sites  
680 neutral mutation model with a constant rate of insertions per generation across the species  
681 tree,  $\theta_1, \theta_2$ , and  $\theta_3$  are functions of the true internal branch length  $\tau^*$  (Equation 12). For  $n$   
682 retroelement insertions generated under the model described above, we can count the  
683 number of retroelement insertions that display one of the three quartet topologies. We  
684 denote these counts as the vector  $\bar{Z} = (Z_1, Z_2, Z_3)$  and assume that  $\bar{Z}$  is generated from a  
685 multinomial distribution parameterized by  $(\theta_1, \theta_2, \theta_3)$ . In practice,  $\bar{Z}$  is estimated from the  
686 retroelement insertion data, and these estimates are denoted  $\bar{z} = (z_1, z_2, z_3)$ .

687 **Theorem 4.** Suppose that  $n$  retroelement insertions are generated under the MSC with  
688 insertions following an infinite sites neutral model (as approximated by Doronina et al.  
689 (2017)), with a constant rate of insertions per generation across the four-taxon species tree.  
690 Let  $z_1$  be the number of quartets associated with branch  $Q$ . Given that  $Q$  corresponds to  
691 the internal branch in the true four-taxon species tree and given the modeling of  $z_1$   
692 described above, the ML estimate of its length is  $W \left[ \frac{2}{3} \left( 1 - \frac{z_1}{n} \right)^{-1} - 1 \right]$ , where  $W$  is  
693 Lambert's function. This holds for  $\frac{1}{3} \leq \frac{z_1}{n} < 1$ . When  $\frac{z_1}{n} = 1$ , the ML estimate does not  
694 exist (note that we set the length equal to  $\infty$  in this case), and when  $\frac{z_1}{n} < \frac{1}{3}$ , the branch  $Q$   
695 cannot be in the true species tree (note that we set the branch length equal to 0 in this  
696 case).

*Proof.* Let  $D \in [0, \infty)$  be a branch length. We model  $D$  as a random variable, so the ML  
estimate of the branch length is  $\arg \max_{\tau \geq 0} P_{Z_1|D}(z_1|\tau; n)$ , where  $P_{Z_1|D}(z_1|\tau; n)$  is the  
likelihood of  $D$ . Given that  $Q$  induces the true quartet topology, by Lemma 1 in Sayyari  
and Mirarab (2016) and Equation 12,

$$P_{Z_1|D}(z_1|\tau; n) \propto \left( \frac{\frac{1}{3}e^{-\tau} + \tau}{e^{-\tau} + \tau} \right)^{z_1} \left( \frac{\frac{1}{3}e^{-\tau}}{e^{-\tau} + \tau} \right)^{n-z_1} \quad (13)$$

We now compute the log-likelihood function

$$\begin{aligned} L(\tau; z, n) &= z_1 \ln \left( \frac{\frac{1}{3}e^{-\tau} + \tau}{e^{-\tau} + \tau} \right) + (n - z_1) \ln \left( \frac{\frac{1}{3}e^{-\tau}}{e^{-\tau} + \tau} \right) \\ &= z_1 \ln \left( \frac{1}{3}e^{-\tau} + \tau \right) + (z_1 - n)\tau - n \ln(e^{-\tau} + \tau) \end{aligned}$$

dropping the constant terms. To find the critical point, we take the first derivative of the log likelihood function

$$\frac{dL(\tau; z_1, n)}{d\tau} = z_1 \frac{1 - \frac{1}{3}e^{-\tau}}{\frac{1}{3}e^{-\tau} + \tau} - n + z_1 - n \frac{1 - e^{-\tau}}{e^{-\tau} + \tau}$$

and set it equal to 0. Therefore, the critical point is given by

$$\begin{aligned} z_1 \frac{1 - \frac{1}{3}e^{-\tau}}{\frac{1}{3}e^{-\tau} + \tau} - n + z_1 - n \frac{1 - e^{-\tau}}{e^{-\tau} + \tau} &= 0 \\ \frac{z_1}{n} \frac{1 - \frac{1}{3}e^{-\tau}}{\frac{1}{3}e^{-\tau} + \tau} - 1 + \frac{z_1}{n} - \frac{1 - e^{-\tau}}{e^{-\tau} + \tau} &= 0 \\ \frac{z_1}{n} \left( \frac{1 - \frac{1}{3}e^{-\tau}}{\frac{1}{3}e^{-\tau} + \tau} + 1 \right) - \left( 1 + \frac{1 - e^{-\tau}}{e^{-\tau} + \tau} \right) &= 0 \\ \frac{z_1}{n} \left( \frac{\frac{1}{3}e^{-\tau} + \tau + 1 - \frac{1}{3}e^{-\tau}}{\frac{1}{3}e^{-\tau} + \tau} \right) - \frac{e^{-\tau} + \tau + 1 - e^{-\tau}}{e^{-\tau} + \tau} &= 0 \\ \frac{\frac{1}{3}e^{-\tau} + \tau}{e^{-\tau} + \tau} &= \frac{z_1}{n} \end{aligned} \tag{14}$$

$$\begin{aligned} \tau e^{\tau} &= \frac{\left(\frac{z_1}{n} - \frac{1}{3}\right)}{\left(1 - \frac{z_1}{n}\right)} = \frac{2}{3} \left(1 - \frac{z_1}{n}\right)^{-1} - 1 \\ \tau &= W \left[ \frac{2}{3} \left(1 - \frac{z_1}{n}\right)^{-1} - 1 \right] \end{aligned} \tag{15}$$

697 where  $W$  is the Lambert's function. Note that  $y = \frac{2}{3} \left(1 - \frac{z_1}{n}\right)^{-1} - 1$  is positive when  
 698  $\frac{1}{3} < \frac{z_1}{n} < 1$  and is undefined at 1. By Proposition 5 in Borwein and Lindstrom (2016),  $W[y]$   
 699 is positive for  $y \in [0, \infty)$  and concave on  $(-1/e, \infty)$  (also see  
 700 <https://www.carma.newcastle.edu.au/resources/jon/WinOpt.pdf>). Therefore, the

701 critical point is a local maximum of the likelihood function of  $D$  when  $\frac{1}{3} \leq \frac{z_1}{n} < 1$ . When  
702  $\frac{z_1}{n} = 1$ , the maximum likelihood estimate does not exist.  $\square$

703 When there are more than four taxa in the species tree, the situation is more  
704 complicated. Consider a branch  $Q$  that splits the leaf set into four disjoint sets  $A, B, C, D$   
705 by the four branches that were incident to  $Q$  (but not their endpoints) and deleting branch  
706  $Q$  including its endpoints. This implies that  $Q$  induces  $m' = |A| \times |B| \times |C| \times |D|$  quartets;  
707 in this case we say that there are  $m'$  quartets “around”  $Q$ . If there are  $n$  retroelement  
708 insertions, then each of the  $m'$  quartets has its own values for  $n$  and  $z_1$ . For a quartet  $k$   
709 ( $1 \leq k \leq m'$ ), let  $n^k$  denote the number of insertions (trials) that display any of the three  
710 possible quartet topologies, and let  $z_1^k$  denote the number of insertions (trials) that display  
711 the quartet that agrees with branch  $Q$ .

One possibility is to take just one of the  $m'$  quartets around branch  $Q$  and compute the maximum likelihood estimate of the branch length from  $z_1^k$  and  $n^k$  (where  $k$  is the index of the selected quartet). For example, we could choose  $k$  to maximize  $n^k$  for  $1 \leq k \leq m'$ . Alternatively, because Equation 14 above is equal to Equation 12, where  $\frac{z_1}{n}$  is the frequentist estimate of the probability of the dominant quartet, we could utilize the  $m'$  quartets to get a better estimate by taking the average value

$$\frac{1}{m'} \sum_{k=1}^{m'} \frac{z_1^k}{n^k} \quad (16)$$

712 Sayyari and Mirarab (2016) provide an efficient algorithm for approximating this quantity  
713 (“q1” when running ASTRAL with option “-t 2”). We corrected the branch lengths by  
714 plugging “q1” into Equation 15 for  $\frac{z_1}{n}$ , and in our simulations, branch length estimation  
715 was accurate (Figure 4).

716

### *Local Posterior Probability*

717 Sayyari and Mirarab (2016) also show how to compute the local posterior probability (local  
 718 PP) for branch  $Q$  (Theorem 1 in Sayyari and Mirarab 2016). In particular, the local PP  
 719 calculation assumes that the gene trees are generated under the MSC from a model species  
 720 tree generated under the Yule process with birth rate  $\lambda$ . Under this assumption, branch  
 721 lengths in the species tree are exponentially distributed, and we take  $f_D(\tau) = 2\lambda e^{-2\lambda\tau}$  as the  
 722 prior for branch lengths (Stadler and Steel 2012). By default, ASTRAL sets  $\lambda = \frac{1}{2}$ , which  
 723 corresponds to a uniform prior on  $\theta_j$  (Lemma 1 in Sayyari and Mirarab 2016).

We show that for retroelement insertions the prior on  $\theta_j$ , denoted  $f_{\theta_j}$ , is not uniform  
 when the species tree is generated under a Yule process with birth rate  $\lambda = \frac{1}{2}$ . For

$$t = \frac{z_1}{n} \geq \frac{1}{3},$$

$$\begin{aligned} f_{\theta_j}(t) &= \frac{1}{3} \frac{1}{\left| \frac{d\theta_j}{dx} \right|} f_D(x) \Big|_{x=W[y]} \\ &= \frac{1}{3} \left( \frac{(e^{-x} + x)^2}{\frac{2}{3}e^{-x}(x+1)} \right) \times 2\lambda e^{-2\lambda x} \Big|_{x=W[y]} = \lambda \left( \frac{(e^{-x} + x)^2}{(x+1)} \right) e^{-\lambda x} \Big|_{x=W[y]} \\ &= \lambda \left( \frac{\left(\frac{W[y]}{y} + W[y]\right)^2}{(W[y] + 1)} \right) \left(\frac{W[y]}{y}\right)^\lambda = \lambda \left( \frac{(W[y](\frac{1+y}{y}))^2}{(W[y] + 1)} \right) \left(\frac{W[y]^\lambda}{y^\lambda}\right) \\ &= \lambda \left( \frac{(1+y)^2}{(W[y] + 1)} \right) \left(\frac{W[y]}{y}\right)^{2+\lambda} \end{aligned} \tag{17}$$

where  $y = \frac{2}{3}(1 - \frac{z_1}{n})^{-1} - 1$ . Recall that  $e^{-kW[y]} = (\frac{W[y]}{y})^k$  (shown as part of Proposition 6 in  
 Borwein and Lindstrom 2016) and Lambert's  $W$  is positive on  $[0, \infty)$  (Proposition 5 in  
 Borwein and Lindstrom 2016). The prior on  $\theta_j$  is not uniform on  $[\frac{1}{3}, 1]$  when  $\lambda = \frac{1}{2}$   
 (Supplementary Figure 1); furthermore, this prior makes it difficult to integrate

$$\int_{\frac{1}{3}}^1 t^{z_j} \left(\frac{1-t}{2}\right)^{n-z_j} f_{\theta_j}(t) dt$$

724 when computing local PP.

725 It is reasonable to have a uniform prior on  $\theta_j$  in the absence of other information,

726 and therefore, one could justify utilizing the branch support returned by ASTRAL for  
727 retroelement data sets for four species. However, we cannot keep the interpretation that  
728 the prior on branch lengths comes from species trees generated under the Yule process with  
729 birth rate  $\lambda$ .

730 Another issue arises when the number of species is greater than four, because as  
731 discussed previously,  $z_1$ ,  $z_2$ ,  $z_3$ , and  $n$  can take on different values for each of the  $m'$   
732 quartets induced by a branch. ASTRAL uses the  $m'$  quartets to estimate each  $z_i$ , taking  $n$   
733 to be the effective number ( $EN$ ) of gene trees (in this case retroelement insertions) for the  
734 branch (this is “EN” when running ASTRAL with option “-t 2”). Computing  $EN$  for each  
735 branch is important when there are missing data (i.e. gene trees can be missing taxa) or  
736 when gene trees are unresolved. The latter is always the case for retroelement data sets, as  
737 insertions are represented as unresolved “gene trees” with a single bipartition.

738 Estimates of the local PP should be interpreted cautiously when  $EN$  is low, and  
739 this can be an issue when analyzing retroelement insertion data sets. For example, when  
740 analyzing the 4,301 retroelement insertions from Cloutier et al. (2019), the branch that  
741 separates Chilean tinamou ( $CT$ ) and Greater Rhea ( $GR$ ) from Emu ( $E$ ) and Great spotted  
742 kiwi ( $GK$ ) (i.e. the branch with length 0.0532 in Fig. 1C) had  $EN = 26.23$ ,  
743  $z_1 = 0.50 \times 26.23 = 13.12$ ,  $z_2 = 0.24 \times 26.23 = 6.30$  and  $z_3 = 0.26 \times 26.23 = 6.81$  (Table 1).  
744 These estimates by ASTRAL are consistent with the analysis by Springer et al. (2020) that  
745 showed only 28 retroelement insertions displayed quartets on these four taxa: 15 insertions  
746 supported  $CT, GR|GK, E$ , 6 insertions supported  $CT, E|GK, GR$ , and 7 insertions  
747 supported  $CT, GK|GR, E$  (Table 3 in Springer et al. 2020). Therefore, we recommend  
748 running ASTRAL with the “-t 2” option and then explicitly checking  $EN$  of each branch  
749 when analyzing retroelement data sets. Investigation of whether the quantities (e.g.  $z_1$ ,  $z_2$ ,  
750  $z_3$ ) computed by ASTRAL are good approximations for retroelement insertion data sets is  
751 a valuable direction for future research.

\*

752

753 References

- 754 Allman, E. S., J. H. Degnan, and J. A. Rhodes. 2011. Identifying the rooted species tree  
755 from the distribution of unrooted gene trees under the coalescent. *J. Math. Biol.*  
756 62:833–862.
- 757 Avise, J. C. and T. J. Robinson. 2008. Hemiplasy: a new term in the lexicon of  
758 phylogenetics. *Syst. Biol.* 57:503–507.
- 759 Borwein, J. M. and S. B. Lindstrom. 2016. Meetings with Lambert W and other special  
760 functions in optimization and analysis. *Pure and Applied Functional Analysis* 1:361–396.
- 761 Bryant, D. and M. Steel. 2001. Constructing optimal trees from quartets. *Journal of*  
762 *Algorithms* 38:237–259.
- 763 Chifman, J. and L. Kubatko. 2015. Identifiability of the unrooted species tree topology  
764 under the coalescent model with time-reversible substitution processes, site-specific rate  
765 variation, and invariable sites. *J. of Theoret. Biol.* 374:35–47.
- 766 Chuong, E. B., N. C. Elde, and C. Feschotte. 2017. Regulatory activities of transposable  
767 elements: from conflicts to benefits. *Nat. Rev. Genet.* 18:71–86.
- 768 Churakov, G., F. Zhang, N. Grundmann, W. Makalowski, A. Noll, L. Doronina, and  
769 J. Schmitz. 2020. The multi-comparative 2-n-way genome suite. *Genome Res.* .
- 770 Cloutier, A., T. B. Sackton, P. Grayson, M. Clamp, A. J. Baker, and S. V. Edwards. 2019.  
771 Whole-genome analyses resolve the phylogeny of flightless birds (Palaeognathae) in the  
772 presence of an empirical anomaly zone. *Syst. Biol.* 68:937–955.
- 773 Degnan, J. H. 2013. Anomalous unrooted gene trees. *Systematic Biology* 62:574–590.



- 774 Degnan, J. H. and N. A. Rosenberg. 2006. Discordance of species trees with their most  
775 likely gene trees. *PLOS Genetics* 2:1–7.
- 776 Degnan, J. H. and N. A. Rosenberg. 2009. Gene tree discordance, phylogenetic inference  
777 and the multispecies coalescent. *Trends Ecol. Evol.* 24:332–340.
- 778 Doronina, L., G. Churakov, A. Kuritzin, J. Shi, R. Baertsch, H. Clawson, and J. Schmitz.  
779 2017. Speciation network in Laurasiatheria: retrophylogenomic signals. *Genome Res.*  
780 27:997–1003.
- 781 Doronina, L., G. Churakov, J. Shi, J. Brosius, R. Baertsch, H. Clawson, and J. Schmitz.  
782 2015. Exploring massive incomplete lineage sorting in arctoids (Laurasiatheria,  
783 Carnivora). *Mol. Biol. Evol.* 32:3194–3204.
- 784 Doronina, L., O. Reising, H. Clawson, D. A. Ray, and J. Schmitz. 2019. True homoplasy of  
785 retrotransposon insertions in Primates. *Syst. Biol.* 68:482–493.
- 786 Felsenstein, J. 1989. PHYLIP - Phylogeny Inference Package (Version 3.2). *Cladistics*  
787 5:164–166.
- 788 Felsenstein, J. 2004. *Inferring phylogenies*. Sinauer Associates, Inc.
- 789 Fisher, R. A. 1922. On the dominance ratio. *Proc. Roy. Soc. B* 42:321–341.
- 790 Gatesy, J., J. H. Geisler, J. Chang, C. Buell, A. Berta, R. W. Meredith, M. S. Springer,  
791 and M. R. McGowen. 2013. A phylogenetic blueprint for a modern whale. *Mol.*  
792 *Phylogenet. Evol.* 66:479–506.
- 793 Gatesy, J., R. W. Meredith, J. E. Janecka, M. P. Simmons, W. J. Murphy, and M. S.  
794 Springer. 2017. Resolution of a concatenation/coalescence kerfuffle: partitioned  
795 coalescence support and a robust family-level tree for Mammalia. *Cladistics* 33:295–332.

- 796 Gatesy, J., D. B. Sloan, J. M. Warren, R. H. Baker, M. P. Simmons, and M. S. Springer.  
797 2019. Partitioned coalescence support reveals biases in species-tree methods and detects  
798 gene trees that determine phylogenomic conflicts. *Mol. Phylogenet. Evol.* 139:106539.
- 799 Gatesy, J. and M. S. Springer. 2014. Phylogenetic analysis at deep timescales: Unreliable  
800 gene trees, bypassed hidden support, and the coalescence/ concatalescence conundrum.  
801 *Mol. Phylogenet. Evol.* 80:231–266.
- 802 Genereux, D. P., A. Serres, J. Armstrong, J. Johnson, V. D. Marinescu, E. Murén,  
803 D. Juan, G. Bejerano, N. R. Casewell, L. G. Chemnick, J. Damas, F. Di Palma,  
804 M. Diekhans, I. Fiddes, M. Garber, V. N. Gladyshev, L. Goodman, W. Haerty, M. L.  
805 Houck, R. Hubley, T. Kivioja, K.-P. Koepfli, L. F. K. Kuderna, E. S. Lander, J. R. W.  
806 Meadows, W. J. Murphy, W. Nash, H. J. Noh, M. Nweeia, A. R. Pfenning, K. S. Pollard,  
807 D. Ray, B. Shapiro, A. Smit, M. S. Springer, C. C. Steiner, R. Swofford, J. Taipale, E. C.  
808 Teeling, J. Turner-Maier, J. Alföldi, B. Birren, O. A. Ryder, H. Lewin, B. Paten,  
809 T. Marques-Bonet, K. Lindblad-Toh, and K. E. K. 2020. A comparative genomics  
810 multitool for scientific discovery and conservation. *Nature* In press.
- 811 Haddrath, O. and A. J. Baker. 2012. Multiple nuclear genes and retroposons support  
812 vicariance and dispersal of the palaeognaths, and an Early Cretaceous origin of modern  
813 birds. *Proc. R. Soc. B* 279:4617–4625.
- 814 He, C., D. Liang, and P. Zhang. 2020. Asymmetric distribution of gene trees can arise under  
815 purifying selection if differences in population size exist. *Mol. Biol. Evol.* 37:881–892.
- 816 Heled, J. and A. J. Drummond. 2010. Bayesian inference of species trees from multilocus  
817 data. *Mol. Biol. Evol.* 27:570–580.
- 818 Hendy, M. D. and D. Penny. 1982. Branch and bound algorithms to determine minimal  
819 evolutionary trees. *Mathematical Biosciences* 60:133–142.

- 820 Hosner, P. A., B. C. Faircloth, T. C. Glenn, E. L. Braun, and R. T. Kimball. 2016.  
821 Avoiding missing data biases in phylogenomic inference: An empirical study in the  
822 landfowl (Aves: Galliformes). *Mol. Biol. Evol.* 33:1110–1125.
- 823 Houde, P., E. L. Braun, N. Narula, U. Minjares, and S. Mirarab. 2019. Phylogenetic signal  
824 of indels and the neoavian radiation. *Diversity* 11:108.
- 825 Huang, H., Q. He, L. S. Kubatko, and L. L. Knowles. 2010. Sources of error inherent in  
826 species-tree estimation: impact of mutational and coalescent effects on accuracy and  
827 implications for choosing among different methods. *Syst. Biol.* 59:573–583.
- 828 Hudson, R. R. 2002. Generating samples under a Wright-Fisher neutral model of genetic  
829 variation. *Bioinformatics* 18:337–338.
- 830 Islam, M., K. Sarker, T. Das, R. Reaz, and M. S. Bayzid. 2020. STELAR: A statistically  
831 consistent coalescent-based species tree estimation method by maximizing triplet  
832 consistency. *BMC Genomics* 21:136.
- 833 Jiang, T., P. Kearney, and M. Li. 2001. A polynomial time approximation scheme for  
834 inferring evolutionary trees from quartet topologies and its application. *SIAM Journal on*  
835 *Computing* 30:1942–1961.
- 836 Kimura, M. 1955a. Solution of a process of random genetic drift with a continuous model.  
837 *Proc. Natl. Acad. Sci. USA* 41:144–150.
- 838 Kimura, M. 1955b. Stochastic processes and distribution of gene frequencies under natural  
839 selection. *Cold Spring Harb Symp Quant Biol* 20:33–53.
- 840 Kuritzin, A., T. Kischka, J. Schmitz, and G. Churakov. 2016. Incomplete lineage sorting  
841 and hybridization statistics for large-scale retroposon insertion data. *PLOS*  
842 *Computational Biology* 12:1–20.

- 843 Lafond, M. and C. Scornavacca. 2019. On the weighted quartet consensus problem.  
844 *Theoretical Computer Science* 769:1–17.
- 845 Lammers, F., M. Blumer, C. Ruckle, and M. A. Nilsson. 2019. Retrophylogenomics in  
846 rorquals indicate large ancestral population sizes and a rapid radiation. *Mobile DNA* 10.
- 847 Liu, L., L. Yu, L. Kubatko, D. K. Pearl, and S. V. Edwards. 2009. Coalescent methods for  
848 estimating phylogenetic trees. *Mol. Phylogenet. Evol.* 53:320–328.
- 849 Maddison, W. P. 1997. Gene trees in species trees. *Syst. Biol.* 46:523–536.
- 850 Mendes, F. K. and M. W. Hahn. 2017. Why concatenation fails near the anomaly zone.  
851 *Systematic Biology* 67:158–169.
- 852 Meredith, R. W., J. E. Janecka, J. Gatesy, O. A. Ryder, C. A. Fisher, E. C. Teeling,  
853 A. Goodbla, E. Eizirik, T. L. L. Simão, T. Stadler, D. L. Rabosky, R. L. Honeycutt, J. J.  
854 Flynn, C. M. Ingram, C. Steiner, T. L. Williams, T. J. Robinson, A. Burk-Herrick,  
855 M. Westerman, N. A. Ayoub, M. S. Springer, and W. J. Murphy. 2011. Impacts of the  
856 Cretaceous Terrestrial Revolution and KPg extinction on mammal diversification.  
857 *Science* 334:521–524.
- 858 Mirarab, S., R. Reaz, M. S. Bayzid, T. Zimmermann, M. S. Swenson, and T. Warnow.  
859 2014. ASTRAL: genome-scale coalescent-based species tree estimation. *Bioinformatics*  
860 30:i541–i548.
- 861 Mirarab, S. and T. Warnow. 2015. ASTRAL-II: coalescent-based species tree estimation  
862 with many hundreds of taxa and thousands of genes. *Bioinformatics* 31:i44–i52.
- 863 Nikaido, M., A. P. Rooney, and N. Okada. 1999. Phylogenetic relationships among  
864 cetartiodactyls based on insertions of short and long interspersed elements:

- 865 hippopotamuses are the closest extant relatives of whales. *Proc. Natl. Acad. Sci. USA*  
866 96:10261–10266.
- 867 Nilsson, M. A., G. Churakov, M. Sommer, N. Van Tran, A. Zemmann, J. Brosius, and  
868 J. Schmitz. 2010. Tracking marsupial evolution using archaic genomic retroposon  
869 insertions. *PLoS Biol.* 8:e1000436.
- 870 Nishihara, H., S. Maruyama, and N. Okada. 2009. Retroposon analysis and recent  
871 geological data suggest near-simultaneous divergence of the three superorders of  
872 mammals. *Proc. Natl. Acad. Sci. USA* 106:5235–5240.
- 873 Nute, M., J. Chou, E. K. Molloy, and T. Warnow. 2018. The performance of  
874 coalescent-based species tree estimation methods under models of missing data. *BMC*  
875 *Genomics* 19:286.
- 876 Oliveros, C. H., D. J. Field, D. T. Ksepka, F. K. Barker, A. Aleixo, M. J. Andersen,  
877 P. Alström, B. W. Benz, E. L. Braun, M. J. Braun, G. A. Bravo, R. T. Brumfield, R. T.  
878 Chesser, S. Claramunt, J. Cracraft, A. M. Cuervo, E. P. Derryberry, T. C. Glenn, M. G.  
879 Harvey, P. A. Hosner, L. Joseph, R. T. Kimball, A. L. Mack, C. M. Miskelly, A. T.  
880 Peterson, M. B. Robbins, F. H. Sheldon, L. F. Silveira, B. T. Smith, N. D. White, R. G.  
881 Moyle, and B. C. Faircloth. 2019. Earth history and the passerine superradiation. *Proc.*  
882 *Natl. Acad. Sci. USA* 116:7916–7925.
- 883 Patel, S., R. T. Kimball, and E. L. Braun. 2013. Error in phylogenetic estimation for  
884 bushes in the tree of life. *J. Phylogenet. Evol. Biol.* 1:110.
- 885 Piovesan, A., F. Antonaros, L. Vitale, P. Strippoli, M. C. Pelleri, and M. Caracausi. 2019.  
886 Human protein-coding genes and gene feature statistics in 2019. *BMC Res. Notes* 12:315.

- 887 Ragan, M. A. 1992. Phylogenetic inference based on matrix representation of trees.  
888 *Molecular Phylogenetics and Evolution* 1:53–58.
- 889 Ray, D. A., J. Xing, A. H. Salem, and M. A. Batzer. 2006. SINEs of a nearly perfect  
890 character. *Syst Biol.* 55:928–935.
- 891 Roch, S., M. Nute, and T. Warnow. 2019. Long-branch attraction in species tree  
892 estimation: inconsistency of partitioned likelihood and topology-based summary  
893 methods. *Syst. Biol.* 68:281–297.
- 894 Roch, S. and M. Steel. 2015. Likelihood-based tree reconstruction on a concatenation of  
895 aligned sequence data sets can be statistically inconsistent. *Theor. Popul. Biol.*  
896 100:56–62.
- 897 Rosenberg, N. A. 2013. Discordance of species trees with their most likely gene trees: a  
898 unifying principle. *Mol. Biol. Evol.* 30:2709–2713.
- 899 Rosenberg, N. A. and R. Tao. 2008. Discordance of species trees with their most likely gene  
900 trees: the case of five taxa. *Syst. Biol.* 57:131–140.
- 901 Sackton, T. B., P. Grayson, A. Cloutier, Z. Hu, J. S. Liu, N. E. Wheeler, P. P. Gardner,  
902 J. A. Clarke, A. J. Baker, M. Clamp, and S. V. Edwards. 2019. Convergent regulatory  
903 evolution and loss of flight in paleognathous birds. *Science* 364:74–78.
- 904 Sanderson, M. J., A. Búrquez, D. Copetti, M. M. McMahon, Y. Zeng, and M. F.  
905 Wojciechowski. 2020. A new (old) approach to genotype-based phylogenomic inference  
906 within species, with an example from the saguaro cactus (*Carnegiea gigantea*). bioRxiv  
907 Page 2020.06.17.157768.
- 908 Sayyari, E. and S. Mirarab. 2016. Fast coalescent-based computation of local branch  
909 support from quartet frequencies. *Mol. Biol. Evol.* 33:1654–1668.

- 910 Schull, J. K., Y. Turakhia, W. J. Dally, and G. Bejerano. 2019. Champagne:  
911 Whole-genome phylogenomic character matrix method places Myomorpha basal in  
912 Rodentia. *bioRxiv* Page 803957.
- 913 Scornavacca, C. and N. Galtier. 2017. Incomplete lineage sorting in mammalian  
914 phylogenomics. *Syst. Biol.* 66:112–120.
- 915 Shedlock, A., K. Takahashi, and N. Okada. 2004. SINEs of speciation: tracking lineages  
916 with retroposons. *Trends Ecol. Evol.* 19:545–553.
- 917 Shedlock, A. M., M. C. Milinkovitch, and N. Okada. 2000. SINE evolution, missing data,  
918 and the origin of whales. *Syst Biol.* 49:808–817.
- 919 Shedlock, A. M. and N. Okada. 2000. SINE insertions: powerful tools for molecular  
920 systematics. *BioEssays* 22:148–160.
- 921 Shen, X.-X., C. T. Hittinger, and A. Rokas. 2017. Contentious relationships in  
922 phylogenomic studies can be driven by a handful of genes. *Nat. Ecol. Evol.* 1:1–10.
- 923 Simmons, M. P. and J. Gatesy. 2015. Coalescence vs. concatenation: Sophisticated analyses  
924 vs. first principles applied to rooting the angiosperms. *Mol. Phylogenet. Evol.* 91:98–122.
- 925 Springer, M. S. and J. Gatesy. 2016. The gene tree delusion. *Mol. Phylogenet. Evol.*  
926 94:1–33.
- 927 Springer, M. S. and J. Gatesy. 2017. Pinniped diphyly and bat triphyly: more homology  
928 errors drive conflicts in the mammalian tree. *J. Hered.* 109:297–307.
- 929 Springer, M. S. and J. Gatesy. 2018a. Delimiting coalescence genes (c-genes) in  
930 phylogenomic data sets. *Genes* 9:123.

- 931 Springer, M. S. and J. Gatesy. 2018b. On the importance of homology in the age of  
932 phylogenomics. *Syst. Biodivers.* 16:210–228.
- 933 Springer, M. S., E. K. Molloy, D. B. Sloan, M. P. Simmons, and J. Gatesy. 2020.  
934 ILS-Aware analysis of low-homoplasmy retroelement insertions: Inference of species trees  
935 and introgression Using quartets. *Journal of Heredity* 111:147–168.
- 936 Springer M. S., G. J. 2014. Land plant origins and coalescence confusion. *Trends Plant Sci.*  
937 19:267–269.
- 938 Stadler, T. and M. Steel. 2012. Distribution of branch lengths and phylogenetic diversity  
939 under homogeneous speciation models. *Journal of Theoretical Biology* 297:33 – 40.
- 940 Suh, A., G. Churakov, M. P. Ramakodi, R. N. Platt II, J. Jurka, K. K. Kojima,  
941 J. Caballero, A. F. Smit, K. A. Vliet, F. G. Hoffmann, J. Brosius, R. E. Green, E. L.  
942 Braun, D. A. Ray, and J. Schmitz. 2015a. Multiple lineages of ancient CR1 retroposons  
943 shaped the early genome evolution of amniotes. *Genome Biol. Evol.* 7:205–217.
- 944 Suh, A., M. Paus, M. Kiefmann, G. Churakov, F. A. Franke, J. Brosius, J. O. Kriegs, and  
945 J. Schmitz. 2011. Mesozoic retroposons reveal parrots as the closest living relatives of  
946 passerine birds. *Nat. Comm.* 2:443.
- 947 Suh, A., L. Smeds, and H. Ellegren. 2015b. The dynamics of incomplete lineage sorting  
948 across the ancient adaptive radiation of neoavian birds. *PLoS Biol.* 13:e1002224.
- 949 Swofford, D. L. 2002. PAUP\*: phylogenetic analysis using parsimony (\*and other  
950 methods). 4.0b10 ed.
- 951 Than, C. and L. Nakhleh. 2009. Species tree inference by minimizing deep coalescences.  
952 *PLoS Comput. Biol.* 5:e1000501.



- 953 Than, C., D. Ruths, and L. Nakhleh. 2008. PhyloNet: a software package for analyzing and  
954 reconstructing reticulate evolutionary relationships. *BMC Bioinformatics* 9:322.
- 955 Than, C. V. and N. A. Rosenberg. 2011. Consistency properties of species tree inference by  
956 minimizing deep coalescences. *J. Comput. Biol.* 18:1–15.
- 957 Vachaspati, P. and T. Warnow. 2015. ASTRID: Accurate species TRees from internode  
958 distances. *BMC Genomics* 16:S3.
- 959 Warnow, T. 2017. *Computational Phylogenetics: An Introduction to Designing Methods*  
960 *for Phylogeny Estimation*. Cambridge University Press, Cambridge, United Kingdom.
- 961 Wright, S. 1931. Evolution in mendelian populations. *Genetics* 16:97–159.
- 962 Xi, Z., L. Liu, J. S. Rest, and C. C. Davis. 2014. Coalescent versus concatenation methods  
963 and the placement of *Amborella* as sister to water lilies. *Syst. Biol.* 63:919–932.
- 964 Zhang, C., M. Rabiee, E. Sayyari, and S. Mirarab. 2018. ASTRAL-III: polynomial time  
965 species tree reconstruction from partially resolved gene trees. *BMC Bioinformatics*  
966 19:153.

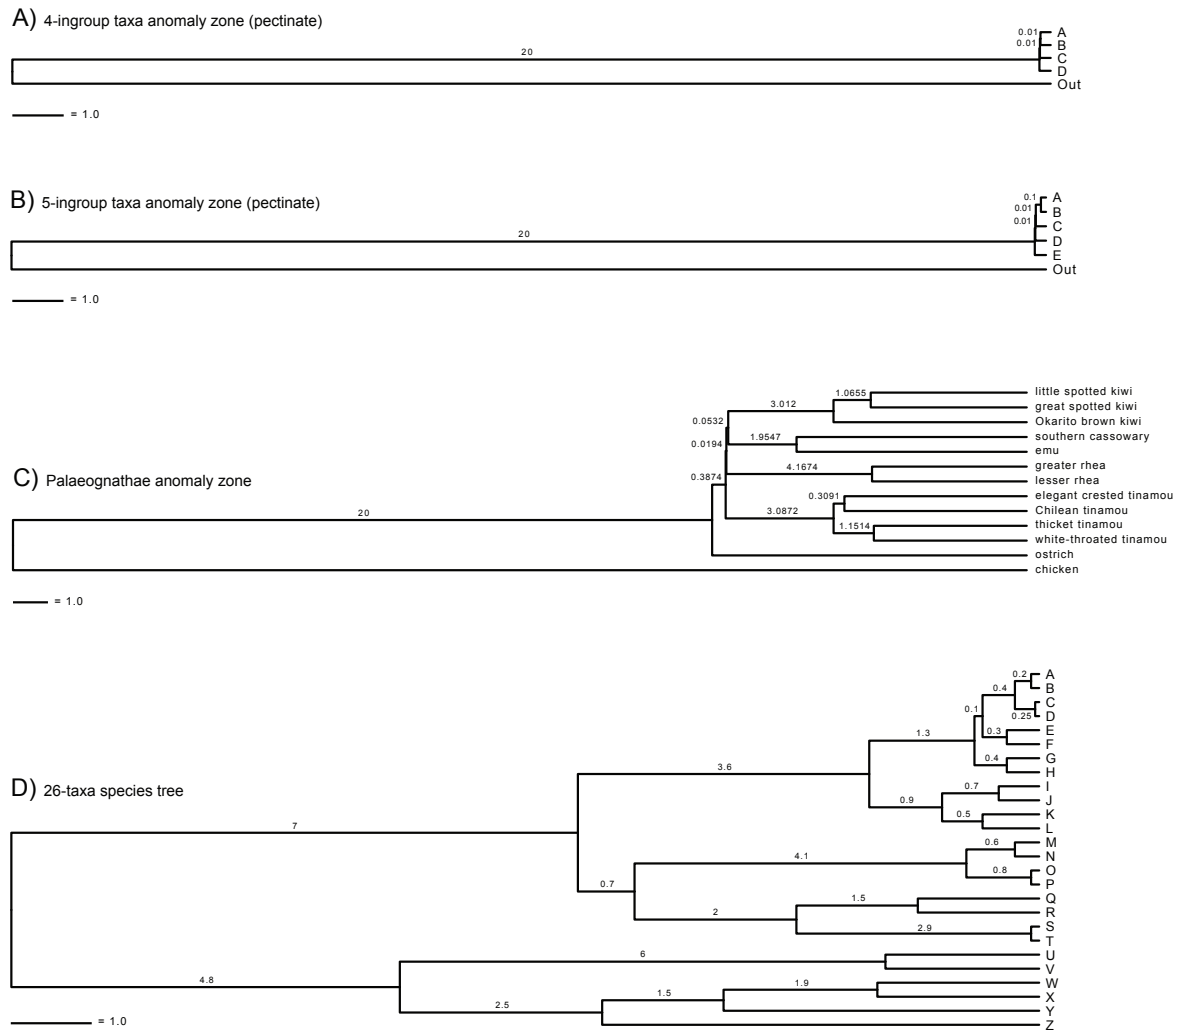

Figure 1: Four species trees that were employed in simulations. (A) 4-ingroup taxa anomaly zone tree, (B) 5-ingroup taxa anomaly zone tree, (C) ASTRAL tree for Palaeognathae from Cloutier et al. (2019), and (D) 26-taxa tree. Branch lengths are in coalescent units (CUs). Newick versions of all trees with branch lengths are available in Supplementary Material.

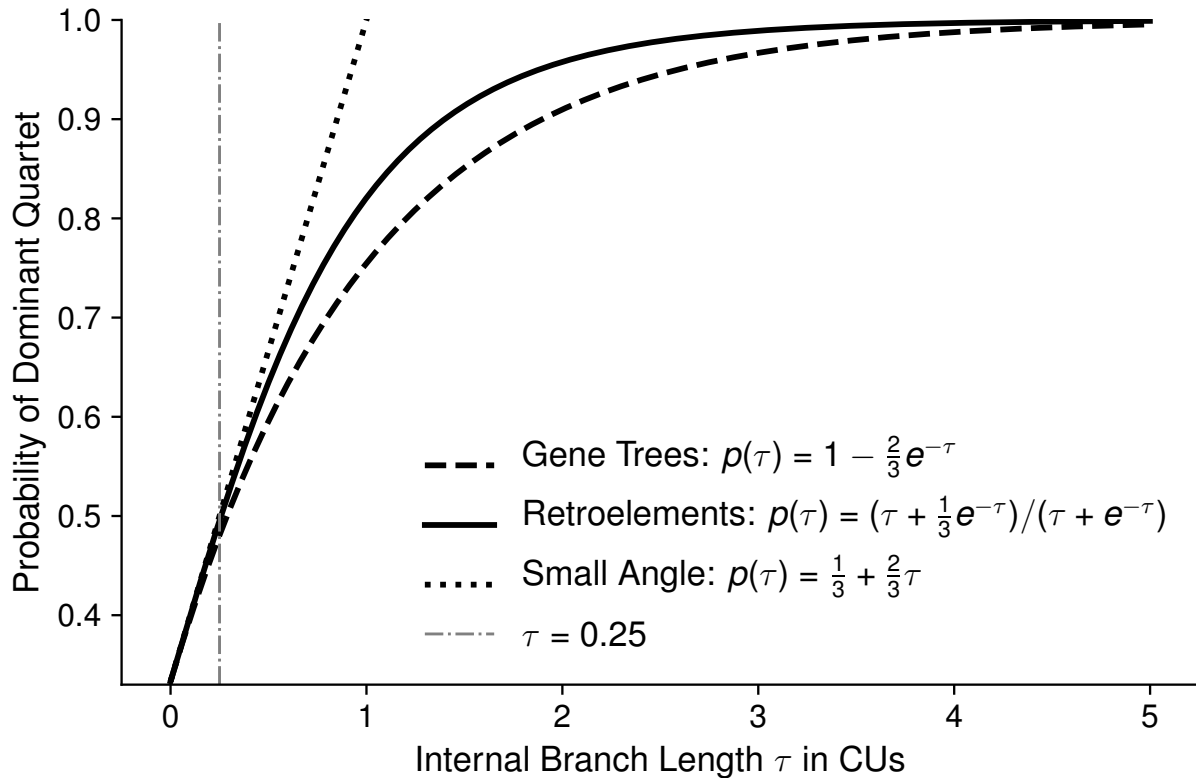

Figure 2: Relationship between the internal branch lengths and the probability of the dominant quartet (i.e. the quartet that agrees with the species tree). The formula for gene trees is under the MSC model (Allman et al. 2011). The formula for retroelements is under the MSC + infinite sites neutral mutation models, assuming that the expected number of new retroelement insertions per generation is constant across the species tree. When the internal branch lengths are sufficiently short so that we can use the small angle approximation  $e^{-\tau} = 1 - \tau$ , the formula for gene trees and the formula for retroelements reduces to the equation shown above; this is the case even when the expected number of new retroelement insertions per generation is not constant across the tree.

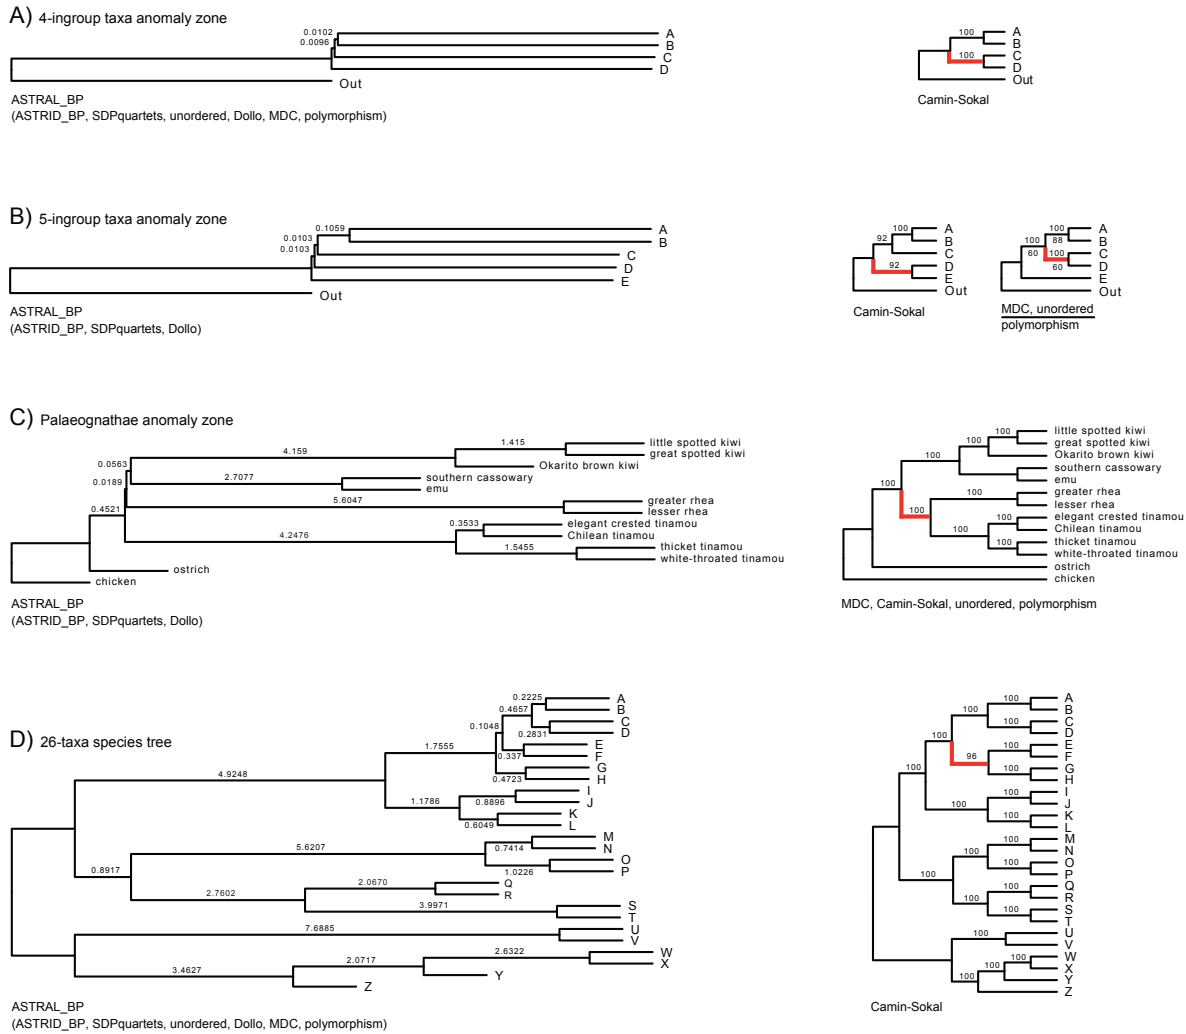

Figure 3: Summary of results for eight different phylogeny reconstruction methods (ASTRAL\_BP, ASTRID\_BP, SDPquartets, Dollo parsimony, Camin-Sokal parsimony, unordered parsimony, polymorphism parsimony, MDC) that were employed to estimate species trees for 25 simulated data sets for each of four different species trees: (A) 4-taxa anomaly zone tree, (B) 5-taxa anomaly zone tree, (C) ASTRAL TENT tree for Palaeognathae from Cloutier et al. (2019), and (D) 26-taxa tree. ASTRAL\_BP species trees with mean MAP branch lengths (in coalescent units) based on analyses of 25 data sets per species tree are shown on the left (see Table 1 in the Supplementary Text for ML branch lengths and corrected branch lengths). ASTRAL\_BP always recovered the correct species tree. Species trees for other methods that recovered the correct species tree for all 25 simulated data sets are shown in parentheses. Dollo parsimony recovered the correct tree for Palaeognathae in 22 of 25 simulations (also in parentheses on the left). Majority-rule consensus species trees for methods that never recovered the correct topology are shown on the right. Numbers above and below branches on these incorrect species trees indicate the percentage of analyses (out of 25) for which each clade was reconstructed. Red branches are those that conflict with the model species tree used to simulate retroelement insertions.

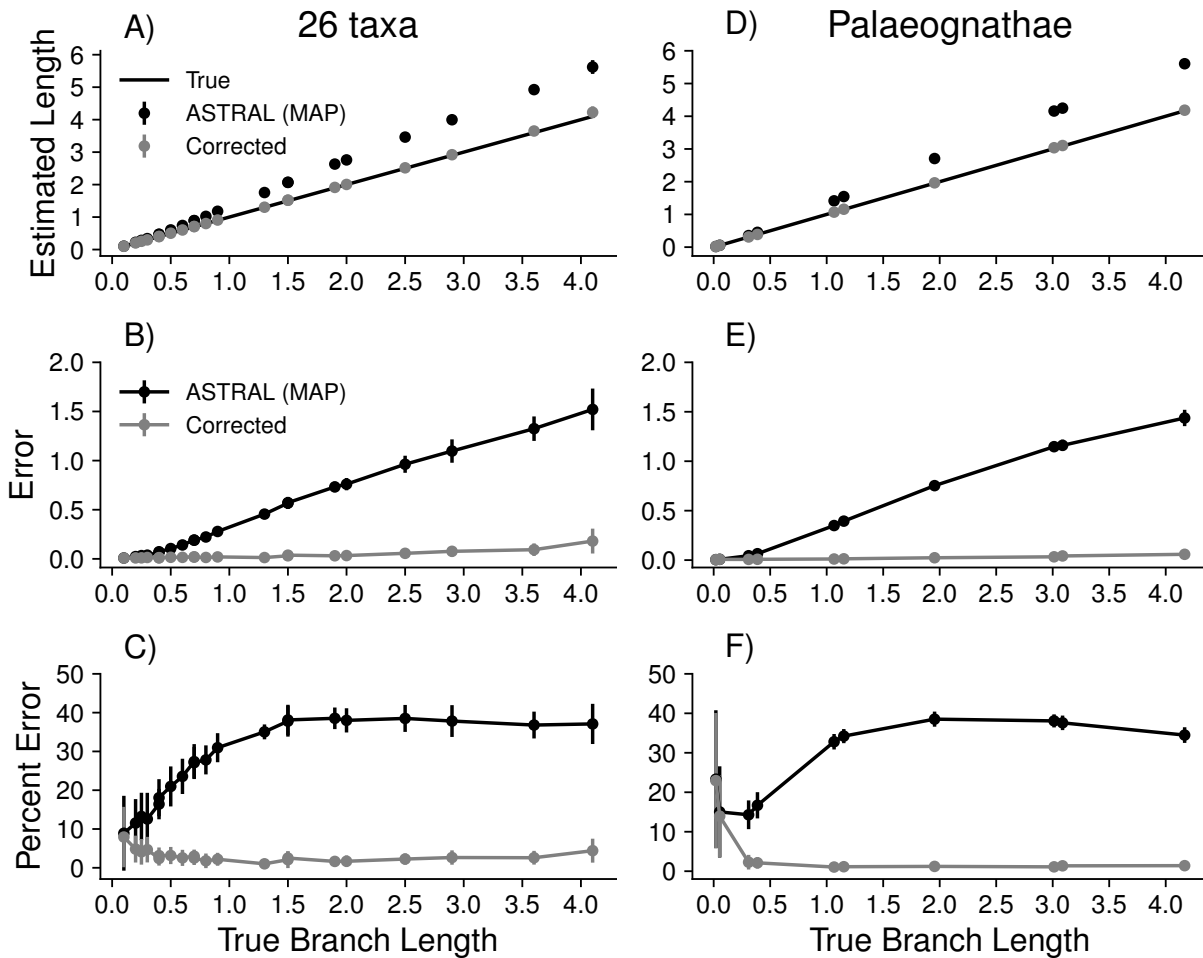

Figure 4: Branch length estimation for two of the four simulated data sets. Only true branch lengths of less than 5 coalescent units are shown, as computing large branch lengths is an ill-conditioned problem (Table 2 in Supplementary Text); results for longer branch lengths are in Table 1 in the Supplementary Text. Subfigures (A) and (D) show the true species tree branch length ( $x$ -axis) plotted against either the true branch lengths, the default (MAP) branch lengths estimated by ASTRAL, or the estimated by ASTRAL and then corrected with Equation 5. Subfigures (B) and (E) show the absolute value of the error:  $abs(\tau^* - \hat{\tau})$ , where  $\hat{\tau}$  is the estimated branch length and  $\tau^*$  is the true branch length. Note that when the true branch length  $\tau^*$  is greater than 0.25 CUs, the both ASTRAL MAP and ML branch length estimates are greater than the true branch length for all 25 replicates (Table 1 in the Supplementary Text). Subfigures (C) and (F) show percent error:  $(abs(\tau^* - \hat{\tau})/\tau^*) \times 100$ . All values are averaged over 25 replicate data sets; dots are means, and bars are standard deviations.

Table 1: Branch lengths for species trees estimated using ASTRAL. ASTRAL TENT is the tree estimated by Cloutier et al. (2019) from 20,850 DNA-sequence-based gene trees. ASTRAL\_BP is the tree produced by running ASTRAL\_BP given the set of 4,301 retroelement insertions from Cloutier et al. (2019). The MAP branch length estimates are the default, the ML branch length estimates are returned by running ASTRAL with the option “-c 0.0,” the corrected branch lengths are computed using Equation 5. When the normalized quartet support (defined below) is 1, Equation 5 is undefined, so we set the branch length to  $\infty$  by default.  $EN$ , the effective number of retroelement insertions for that branch, can be smaller than the total number of insertions, because the insertions represent a single bipartition rather than a fully resolved gene tree. Note that all branches in the ASTRAL\_BP tree had local PP of 1.0, except Kiwi, Casowary, & Emu, which had a local PP of 0.89. Regardless, when the  $EN$  is low, local PP should be interpreted cautiously.

| Clade                            | ASTRAL TENT Analysis |               | ASTRAL_BP Analysis           |                          |         | EN |
|----------------------------------|----------------------|---------------|------------------------------|--------------------------|---------|----|
|                                  | Branch Length<br>MAP | Branch Length | MAP / ML / Corrected         | Quartet Support          | EN      |    |
| Kiwi, Casowary, Emu, Rhea        | 0.0194               |               | 0.8938 / 1.1176 / 0.8657     | 0.7820 / 0.1429 / 0.0752 | 13.30   |    |
| Kiwi, Casowary, Emu              | 0.0532               |               | 0.2528 / 0.2890 / 0.2587     | 0.5006 / 0.2402 / 0.2592 | 26.23   |    |
| Chilean, elegant created tinamou | 0.3091               |               | 1.7081 / 1.8124 / 1.3408     | 0.8912 / 0.0272 / 0.0816 | 73.50   |    |
| All but chicken & ostrich        | 0.3874               |               | 2.5390 / $\infty$ / $\infty$ | 1.0000 / 0.0000 / 0.0000 | 18.00   |    |
| Spotted kiwi                     | 1.0655               |               | 3.4999 / 3.8986 / 2.8358     | 0.9865 / 0.0000 / 0.0135 | 148.00  |    |
| White-throated, thicket tinamou  | 1.1514               |               | 4.7155 / 5.4057 / 4.0119     | 0.9970 / 0.0030 / 0.0000 | 334.00  |    |
| Casowary & emu                   | 1.9547               |               | 3.6966 / $\infty$ / $\infty$ | 1.0000 / 0.0000 / 0.0000 | 59.46   |    |
| All kiwi                         | 3.0120               |               | 6.3045 / $\infty$ / $\infty$ | 1.0000 / 0.0000 / 0.0000 | 819.54  |    |
| All tinamou                      | 3.0872               |               | 5.6043 / 7.1065 / 5.4162     | 0.9994 / 0.0000 / 0.0006 | 522.79  |    |
| All rhea                         | 4.1674               |               | 7.3466 / $\infty$ / $\infty$ | 1.0000 / 0.0000 / 0.0000 | 2325.47 |    |
